# Supplementary material for: Traumatic stress symptoms in family caregivers of patients with acute leukaemia: protocol for a multisite mixed methods, longitudinal, observational study
Source: PubMed Central journal article supplement — BMJ Open. 2022 Nov 4;12(11):e065422. doi: 10.1136/bmjopen-2022-065422 (PMC9639100; doi:10.1136/bmjopen-2022-065422), 2022-11-04
Supplement: bmjopen-2022-065422.draft_revisions.pdf [file bmjopen-2022-065422.draft_revisions.pdf]

# BMJ Open

BMJ Open is committed to open peer review. As part of this commitment we make the peer review history of every article we publish publicly available.

When an article is published we post the peer reviewers' comments and the authors' responses online. We also post the versions of the paper that were used during peer review. These are the versions that the peer review comments apply to.

The versions of the paper that follow are the versions that were submitted during the peer review process. They are not the versions of record or the final published versions. They should not be cited or distributed as the published version of this manuscript.

BMJ Open is an open access journal and the full, final, typeset and author-corrected version of record of the manuscript is available on our site with no access controls, subscription charges or pay-per-view fees (<http://bmjopen.bmj.com>).

If you have any questions on BMJ Open's open peer review process please email [info.bmjopen@bmj.com](mailto:info.bmjopen@bmj.com)

# BMJ Open

## Traumatic stress symptoms in family caregivers of patients with acute leukemia: protocol for a multisite mixed methods, longitudinal, observational study

|                               |                                                                                                                                                                                                                                                                                                                                                                                                                                                                                                                                                                                                                                                                                                                                                                                                                                                                                                                                                                                                                                                                                                                                                                                                                                                                                                                                                                                                                                             |
|-------------------------------|---------------------------------------------------------------------------------------------------------------------------------------------------------------------------------------------------------------------------------------------------------------------------------------------------------------------------------------------------------------------------------------------------------------------------------------------------------------------------------------------------------------------------------------------------------------------------------------------------------------------------------------------------------------------------------------------------------------------------------------------------------------------------------------------------------------------------------------------------------------------------------------------------------------------------------------------------------------------------------------------------------------------------------------------------------------------------------------------------------------------------------------------------------------------------------------------------------------------------------------------------------------------------------------------------------------------------------------------------------------------------------------------------------------------------------------------|
| Journal:                      | <i>BMJ Open</i>                                                                                                                                                                                                                                                                                                                                                                                                                                                                                                                                                                                                                                                                                                                                                                                                                                                                                                                                                                                                                                                                                                                                                                                                                                                                                                                                                                                                                             |
| Manuscript ID                 | bmjopen-2022-065422                                                                                                                                                                                                                                                                                                                                                                                                                                                                                                                                                                                                                                                                                                                                                                                                                                                                                                                                                                                                                                                                                                                                                                                                                                                                                                                                                                                                                         |
| Article Type:                 | Protocol                                                                                                                                                                                                                                                                                                                                                                                                                                                                                                                                                                                                                                                                                                                                                                                                                                                                                                                                                                                                                                                                                                                                                                                                                                                                                                                                                                                                                                    |
| Date Submitted by the Author: | 02-Jun-2022                                                                                                                                                                                                                                                                                                                                                                                                                                                                                                                                                                                                                                                                                                                                                                                                                                                                                                                                                                                                                                                                                                                                                                                                                                                                                                                                                                                                                                 |
| Complete List of Authors:     | Jibb, Lindsay; The Hospital for Sick Children, CHES; University of Toronto, Nursing<br>Nanos, Stephanie; Princess Margaret Hospital Cancer Centre, Supportive Care; The Hospital for Sick Children, CHES<br>Alexander, Sarah; The Hospital for Sick Children, Haematology/Oncology; University of Toronto, Pediatrics<br>Malfitano, Carmine; Princess Margaret Hospital Cancer Centre, Supportive Care<br>Rydall, Anne; Princess Margaret Hospital Cancer Centre, Supportive Care<br>Gupta, Sumit; The Hospital for Sick Children, Haematology/Oncology; University of Toronto, Pediatrics<br>Schimmer, Aaron; Princess Margaret Hospital Cancer Centre, Medical Oncology/Hematology; University of Toronto, Medical Biophysics<br>Zimmermann, Camilla; Princess Margaret Hospital Cancer Centre, Supportive Care; University of Toronto, Psychiatry<br>Hales, Sarah; Princess Margaret Hospital Cancer Centre, Supportive Care; University of Toronto, Psychiatry<br>Nissim, Rinat; Princess Margaret Hospital Cancer Centre, Supportive Care; University of Toronto, Psychiatry<br>Marmar, Charles; New York University, Psychiatry<br>Schultebraucks, Katharina; Columbia University Irving Medical Center, Emergency Medicine; Columbia University, Psychiatry<br>Mah, Kenneth; University Health Network, Supportive Care<br>Rodin, Gary; Princess Margaret Hospital Cancer Centre, Supportive Care; University of Toronto, Psychiatry |
| Keywords:                     | Leukaemia < HAEMATOLOGY, Leukaemia < ONCOLOGY, Adult palliative care < PALLIATIVE CARE, Paediatric palliative care < PALLIATIVE CARE, Anxiety disorders < PSYCHIATRY, QUALITATIVE RESEARCH                                                                                                                                                                                                                                                                                                                                                                                                                                                                                                                                                                                                                                                                                                                                                                                                                                                                                                                                                                                                                                                                                                                                                                                                                                                  |
|                               |                                                                                                                                                                                                                                                                                                                                                                                                                                                                                                                                                                                                                                                                                                                                                                                                                                                                                                                                                                                                                                                                                                                                                                                                                                                                                                                                                                                                                                             |

SCHOLARONE™  
Manuscripts

**TITLE PAGE****Title of the article**

Traumatic stress symptoms in family caregivers of patients with acute leukemia: protocol for a multisite mixed methods, longitudinal, observational study

**Full name, postal address and e-mail of the corresponding author**

Gary Rodin, 700 Bay Street, Toronto, ON, Canada M5G 1Z6

[Gary.Rodin@uhn.ca](mailto:Gary.Rodin@uhn.ca)

**Full name, department, institution, city and country of all co-authors**

Lindsay Jibb, Child Health Evaluative Sciences, Hospital for Sick Children, Toronto, Canada; Lawrence S Bloomberg Faculty of Nursing, University of Toronto, Toronto, Canada

Stephanie M. Nanos, Department of Supportive Care, Princess Margaret Cancer Centre, University Health Network, Toronto, Canada; Child Health Evaluative Sciences, Hospital for Sick Children, Toronto, Canada

Sarah Alexander, Division of Haematology/Oncology, Hospital for Sick Children, Toronto, Canada; Department of Pediatrics, University of Toronto, Toronto, Canada

Carmin Malfitano, Department of Supportive Care, Princess Margaret Cancer Centre, University Health Network, Toronto, Canada

Anne Rydall, Department of Supportive Care, Princess Margaret Cancer Centre, University Health Network, Toronto, Canada

Sumit Gupta, Division of Haematology/Oncology, Hospital for Sick Children, Toronto, Canada; Department of Pediatrics, University of Toronto, Toronto, Canada

Aaron D. Schimmer, Department of Medical Oncology/Hematology, Princess Margaret Cancer Centre, University Health Network, Toronto, Canada; Department of Medical Biophysics, University of Toronto, Toronto, Canada

Camilla Zimmermann, Department of Supportive Care, Princess Margaret Cancer Centre, University Health Network, Toronto, Canada; Department of Psychiatry, University of Toronto, Toronto, Canada

Sarah Hales, Department of Supportive Care, Princess Margaret Cancer Centre, University Health Network, Toronto, Canada; Department of Psychiatry, University of Toronto, Toronto, Canada

Rinat Nissim, Department of Supportive Care, Princess Margaret Cancer Centre, University Health Network, Toronto, Canada; Department of Psychiatry, University of Toronto, Toronto, Canada

Charles Marmar, Department of Psychiatry, New York University, New York, USA

Katharina Schultebras, Department of Emergency Medicine, Columbia University Irving Medical Centre, New York, USA; Department of Psychiatry, Columbia University, New York, USA

Kenneth Mah, Department of Supportive Care, Princess Margaret Cancer Centre, University Health Network, Toronto, Canada

Gary Rodin, Department of Supportive Care, Princess Margaret Cancer Centre, University Health Network, Toronto, Canada; Department of Psychiatry, University of Toronto, Toronto, Canada

**Word count:** 3,397

## ABSTRACT

**Introduction** The diagnosis, progression, or recurrence of cancer is often highly traumatic for family caregivers (FCs), but systematic assessments of distress and approaches for its prevention and treatment are lacking. Acute leukemia (AL) is a life-threatening cancer of the blood, which most often presents acutely, requires intensive treatment, and is associated with severe physical symptoms. Consequently, traumatic stress may be common in the FCs of patients with AL. We aim to determine the prevalence, severity, longitudinal course, and predictors of traumatic stress symptoms in FCs of patients with AL in the first year after diagnosis, and to understand their lived experience of traumatic stress and perceived support needs.

**Methods and analysis** This two-site longitudinal, observational, mixed methods study will recruit 223 adult FCs of pediatric or adult patients newly diagnosed with AL from 2 tertiary care centres. Quantitative data will be collected from self-report questionnaires at enrolment, and 1, 3, 6, 9 and 12-months after admission to hospital for initial treatment. Quantitative data will be analyzed using descriptive and machine learning approaches and a multi-level modelling approach will be used to confirm machine learning findings. Semi-structured qualitative interviews will be conducted at 3, 6, and 12-months and analyzed using a grounded theory approach.

**Ethics and dissemination** This study is funded by the Canadian Institutes of Health Research (CIHR #PJT 173255) and has received ethical approval from the Ontario Research Ethics Board (CTO Project ID: 2104). The data generated have the potential to inform the development of targeted psychosocial interventions for traumatic stress, which is a public health priority for high-risk populations such as FCs of patients with hematological malignancies. An integrated and end-of-study knowledge translation strategy that involves FCs and other stakeholders will be used to interpret and disseminate study results.

**Keywords** cancer; hematological malignancies; acute leukemia; supportive care; psychosocial intervention; traumatic stress; caregivers

## ARTICLE SUMMARY

### Strengths and limitations of this study

- This will be the first longitudinal study to examine traumatic stress symptoms and the related lived experience of family caregivers of patients diagnosed with acute leukemia.
- This study will include the family caregivers of patients of all ages and will provide an opportunity to understand the impact of patient age and relationship of the caregiver to the patient on caregivers' traumatic stress symptoms.
- The findings from this study will inform the development of a tailored psychosocial intervention to prevent and alleviate traumatic stress in this high-risk population.
- Limitations of this study include potential impact of the COVID-19 pandemic on recruitment and the potential for loss to follow-up in longitudinal research.

## INTRODUCTION

Acute leukemia (AL) is a life-threatening hematological malignancy characterized by rapid onset, the requirement for immediate hospitalization to initiate care, and intensive and prolonged medical treatment. The primary types of AL are acute lymphoblastic leukemia (ALL) and acute myeloid leukemia (AML). Both occur in patients of all ages, but the epidemiology, disease features, and outcomes vary with age and disease type. Treatment of AL is associated with the risk of serious and potentially fatal side effects including bleeding, infection, mucositis, nausea and vomiting, pain, and multiple other drug-specific side effects.[1-3] There is now robust evidence showing that the diagnosis of AL in patients from infants to older adults is a singularly stressful event, followed by a period of intense and difficult life choices and experiences.[4-9] Those who are cured of AL may still endure long-term treatment sequelae including neurocognitive deficits, infertility, endocrine, musculoskeletal and cardiac impairments, and risk of secondary cancers.[6,10-14]

### **The impact of AL on family caregivers**

The diagnosis of AL and its treatment impose a substantial burden on family caregivers (FCs), who may be partners, adult children, or parents.[7-9] FCs of patients with cancer are increasingly expected to assume lead roles in complex clinical tasks, such as coordination of care, symptom management, medication administration, and direct patient care, while maintaining other ongoing responsibilities, such as employment and care for other dependents.[15-23] These multiple roles, coupled with financial strain due to the cost of non-reimbursed medical care, travel, other family caregiving and home responsibilities, and the loss of employment income, are major sources of distress for FCs.[16,24,25] This burden of caring,[24] which falls disproportionately on women, [26] and the constant threat that a partner, parent, or child will suffer or die, constitute substantial threats to the mental and physical health of FCs.[27-29]

### **Traumatic stress symptoms**

The immediate psychological response to the diagnosis of a life-threatening cancer of both patients and FCs is often traumatic stress (TS) symptoms.[4,5,28,30] These symptoms include hyperarousal (e.g., hypervigilance, decreased concentration, heightened startle response, insomnia, irritability), intrusive thoughts (e.g., nightmares, flashbacks, altered sense of reality), emotional detachment or numbing, and depression.[31,32] Symptoms of TS occurring within one month of the traumatic event may meet the Diagnostic and Statistical Manual of Mental Disorders (DSM) criteria for acute stress disorder (ASD) and those that persist for longer than a month may meet diagnostic criteria for post-traumatic stress disorder (PTSD).[31] Risk factors for ASD and PTSD following a traumatic event include younger age, female sex, feminine gender role, and direct or vicarious exposure to traumatic events, including in first responders to trauma victims.[33-35] Gender is not only a risk factor for PTSD in its own right but is also a proxy for multiple interacting social, economic, and political influences on distress.[36] As a whole, traumatic stress disorders are highly disturbing to those affected and are associated with a subsequent ten-fold increase in the risk of completed suicide[37] and an increased risk of cardiovascular, metabolic, and musculoskeletal disorders[38] and all-cause mortality.[39]

### **The social context of traumatic stress symptoms**

The social environment in which individuals exposed to trauma are situated has been shown to directly affect the severity and nature of TS symptoms.[36] In that regard, the inverse relationship between symptoms of PTSD and social support, including that received from healthcare

professionals (HCPs), is one of the most consistent relationships observed in trauma research.[40-42] Internalized representations of support and the capacity to make use of it, reflected in the construct of attachment security,[43] have also been shown to protect from the development of PTSD following exposure to trauma.[44] Measured on dimensions of attachment anxiety and attachment avoidance,[45,46] attachment security has been shown to play a critical role in the management of terror, specifically that related to death anxiety.[47]

### **Traumatic stress symptoms in family caregivers**

Clinically significant TS symptoms are common in FCs of patients with metastatic cancer, with similar rates in partners and parents of patients.[28,48] Risk factors that have been identified for the development of TS in FCs of patients include: (i) FC variables such as female sex,[49] identification with traditionally feminine gender roles,[28,50] younger age,[27] less social support and less attachment security,[51] lower family income,[29] and higher perceived burden of caregiving tasks;[52,53] (ii) patient variables such as younger age[54] and greater disease severity;[55] and (iii) the nature of the caregiver-patient relationship,[56] with close familial relationships being associated with greater TS.[57,58]

Research has demonstrated the psychological impact of metastatic cancer on patients[59,60] and their FCs.[58] Several studies have highlighted the psychological impact of hematological malignancies on patients.[4,5,61] However, there has been little research attention to the psychological consequences of hematological malignancies on FCs, and systematic approaches to prevent and alleviate distress in this high-risk population have not been developed. The acute onset of AL, the intensive and prolonged treatment, the substantial burden of caregiving, and the uncertainty regarding clinical outcomes suggest that TS symptoms may be common in FCs. However, the prevalence, severity, and predictors of TS over time, and the experience of FCs of patients with AL across the life course have not been determined.

### **Study objectives**

The objectives of the present study are to determine in FCs of patients with AL:

1. The prevalence, severity, longitudinal course, and predictors of TS symptoms over the first year following a new diagnosis of AL;
2. The FC experience of TS, including the impact of AL on their lives and that of their families, the nature of their distress, their relationship with HCPs, and their perceived resources and met and unmet support needs.

The findings from this study will provide essential information to inform research, clinical practice, and health policy regarding the comprehensive and family-centred treatment of AL.

## **METHODS AND ANALYSIS**

### **Patient and public involvement**

This study will be conducted with the early and ongoing engagement of FCs and other stakeholders. Specifically, our FC- and HCP-collaborators have informed the construction of this study, including the mixed methods approach and relevant sampling timepoints, will be closely involved in the interpretation and dissemination of the data, and will lead in advocacy efforts to support



1  
2  
3 policy change related to the care of FCs. The patient and family advisory councils at our study  
4 sites will also be engaged to support study conduct from implementation to dissemination.  
5

### 6 7 **Study design and setting**

8 This is a prospective, observational study using mixed quantitative and qualitative methodology.  
9 FCs will be recruited from the Princess Margaret Cancer Centre, part of the University Health  
10 Network, and the Hospital for Sick Children, in Toronto, Canada.  
11

### 12 13 **Eligibility criteria**

14 FCs will be: (i) the self-identified primary or co-primary caregiver (i.e., person assuming at least  
15 40% of patient care activities) of a pediatric or adult patient newly diagnosed with primary AL  
16 (AML or ALL) within three months of admission to either of our study sites; (ii)  $\geq 18$  years old;  
17 and (iii) fluent in English.  
18

### 19 20 **Ineligibility criteria**

21 FCs of patients with acute promyelocytic leukemia (APML) or who do not receive induction  
22 chemotherapy with curative intent will be ineligible.  
23

### 24 25 **Data collection**

26 FC recruitment will occur over 36 months and is expected to be completed in 2024. Following  
27 informed consent, participating FCs will complete a demographics questionnaire and the disease-  
28 related characteristics of the associated patient will be abstracted from the patient's medical chart  
29 (Table 1). FCs will then complete a baseline outcome questionnaire package on REDCap (i.e., a  
30 secure online browser-based application for building and managing online surveys and research  
31 databases), and follow-up online outcome questionnaire packages at 1, 3, 6, 9 and 12-months after  
32 the patient's admission to the hospital for a new diagnosis of AL (Table 1). Questionnaire package  
33 completion time is expected to be 20-30 minutes at each assessment point. A subgroup of FCs will  
34 be invited to participate in audio- and/or video-recorded, semi-structured, qualitative interviews at  
35 3, 6, and 12-months. Interviewees may participate in interviews at more than one sampling  
36 timepoint. Sampling for interviews will be purposeful in an attempt to achieve maximum variation  
37 in FC characteristics including age, sex, gender, gender role, FC-patient relationship, scores on  
38 quantitative measures, race, ethnicity, and patient's AL type. The interviews will be conducted by  
39 a trained interviewer and will focus on the FC experience of caring for someone with AL, the  
40 impact of caring on the lives of FCs and that of their families, FC met and unmet support needs,  
41 and the FC experience with the patient's treatment and HCPs (Table 2). Interviews are expected  
42 to last between 30-60 minutes.  
43  
44  
45  
46  
47  
48  
49  
50  
51  
52  
53  
54  
55  
56  
57  
58  
59  
60

**Table 1. Timeline of study activities**

|                                                    | <b>Enrollment<br/>Baseline</b> | <b>1-Month<br/>Follow-up<br/>Baseline*</b> | <b>3-Months<br/>Follow-up<br/>Baseline*</b> | <b>6-Months<br/>Follow-up</b> | <b>9-Months<br/>Follow-up</b> | <b>12-Months<br/>Follow-up</b> |
|----------------------------------------------------|--------------------------------|--------------------------------------------|---------------------------------------------|-------------------------------|-------------------------------|--------------------------------|
| <b>Recruitment</b>                                 |                                |                                            |                                             |                               |                               |                                |
| <b>Confirm Eligibility</b>                         | ✓                              | *                                          | *                                           |                               |                               |                                |
| <b>Initial Approach</b>                            | ✓                              | *                                          | *                                           |                               |                               |                                |
| <b>Caregiver Quantitative<br/>Informed Consent</b> | ✓                              | *                                          | *                                           |                               |                               |                                |
| <b>Caregiver Qualitative<br/>Informed Consent</b>  |                                |                                            | ✓                                           |                               |                               |                                |
| <b>Patient Informed<br/>Consent/Assent**</b>       | ✓                              | *                                          | *                                           |                               |                               |                                |
| <b>Quantitative Data Collection</b>                |                                |                                            |                                             |                               |                               |                                |
| <b>Demographics</b>                                | ✓                              | *                                          | *                                           |                               |                               |                                |
| <b>PCL-5</b>                                       | ✓                              | ✓                                          | ✓                                           | ✓                             | ✓                             | ✓                              |
| <b>SASRQ</b>                                       | ✓                              | ✓                                          | ✓                                           | ✓                             | ✓                             | ✓                              |
| <b>ECR-M16</b>                                     | ✓                              | ✓                                          | ✓                                           | ✓                             | ✓                             | ✓                              |
| <b>PHQ-9</b>                                       | ✓                              | ✓                                          | ✓                                           | ✓                             | ✓                             | ✓                              |
| <b>CRA</b>                                         | ✓                              | ✓                                          | ✓                                           | ✓                             | ✓                             | ✓                              |
| <b>ESSI</b>                                        | ✓                              | ✓                                          | ✓                                           | ✓                             | ✓                             | ✓                              |
| <b>FAMCARE</b>                                     | ✓                              | ✓                                          | ✓                                           | ✓                             | ✓                             | ✓                              |
| <b>TMF</b>                                         | ✓                              | *                                          | *                                           |                               |                               |                                |
| <b>Qualitative Data Collection</b>                 |                                |                                            |                                             |                               |                               |                                |
| <b>Interview</b>                                   |                                |                                            | ✓                                           | ✓                             |                               | ✓                              |
| <b>Patient Chart Data Collection</b>               |                                |                                            |                                             |                               |                               |                                |
| <b>Medical Abstraction</b>                         | ✓                              | ✓                                          | ✓                                           | ✓                             | ✓                             | ✓                              |

*Table 1 Footnotes:*

\*FCs recruited two weeks to three months after admission to the hospital will complete a baseline questionnaire package at either the 1-month or 3-month timepoint. Follow-up questionnaire packages will be completed at subsequent timepoints.

\*\*Adult patients with AL ( $\geq 18$  years of age) and pediatric patients with AL will be asked to provide their informed consent and/or assent, respectively, to allow medical chart information regarding their disease and its treatment to



be extracted and documented over the course of this study. The determination of whether consent or assent is necessary for the pediatric patients will be based on a capacity assessment by a regulated healthcare professional from the research or clinical team.

Abbreviations: PCL-5 = PTSD Checklist for DSM-5; PTSD = Post-Traumatic Stress Disorder; DSM-5 = Diagnostic and Statistical Manual of Mental Disorders, Fifth Edition; SASRQ = Stanford Acute Stress Reaction Questionnaire; ECR-M16 = modified and brief Experiences in Close Relationships scale; PHQ-9 = Patient Health Questionnaire-9; CRA = Caregiver Reaction Assessment scale; ESSI = ENRICH Social Support Instrument; FAMCARE = Family Satisfaction with End-of-Life Care scale; TMF = Traditional Masculinity-Femininity scale.

**Table 2. Example questions from the semi-structured qualitative interview guide**

### Impact of the Disease

Can you describe what it was like for you when you first heard about [patient's] diagnosis of leukemia?  
How, if at all, have things changed for you since [patient's] diagnosis of leukemia?

### Experience of Support

How supported have you felt?  
What types of support have you received?

### Experience of Care

What is your experience with the care [patient] has received from the hospital?  
Can you describe your relationship with the medical team?

## Outcome measures

### Primary outcome

(i) **Traumatic stress symptoms**, will be measured with the 30-item Stanford Acute Stress Reaction Questionnaire (SASRQ)[62,63] updated to be DSM-5-concordant[31] for ASD symptoms. This scale is one of the most widely used scales for measuring TS symptoms and has demonstrated test-retest reliability,[62,63] and predictive, construct, discriminant, and convergent validity across diverse samples.[62-66] The DSM-5-concordant version of the SASRQ has not yet been validated. Therefore, the 20-item PTSD Checklist for DSM-5 (PCL-5) will also be administered.[67] The PCL-5 is widely used to assess TS symptoms and the revised DSM-5 version has demonstrated good psychometric properties.[68-70]

### Predictors

(i) **Attachment security**, will be measured with the modified and brief Experiences in Close Relationships (ECR-M16) scale.[46] The ECR-M16 is a widely used, reliable, and valid 16-item measure of attachment security with subscales assessing anxious and avoidant attachment.

(ii) **Depressive symptoms**, will be measured with the Patient Health Questionnaire-9 (PHQ-9).[71] The PHQ-9 is a reliable and valid 9-item measure routinely administered to screen for depressive symptoms in cancer. Two additional items assessing suicidal intent and interference with life have been added.[72,73]

(iii) **Caregiver burden**, will be measured with the Caregiver Reaction Assessment (CRA) scale.[74] The CRA is a reliable and valid 24-item scale assessing positive and negative reactions to five domains of caregiver burden: disrupted schedule, financial problems, lack of family support, health problems, and the impact on self-esteem.

(iv) **Perceived social support**, will be measured with the ENRICH Social Support Instrument (ESSI).[75] The ESSI is a 7-item scale assessing the perceived availability of social support. This measure has been used in AL and has shown good reliability and validity.[76,77]

(v) **FC satisfaction with care**, will be measured with the Family Satisfaction with End-of-Life Care (FAMCARE) scale.[78] The FAMCARE is a reliable and valid 20-item scale measuring satisfaction with the behaviour of HCPs towards FCs and the patients they care for diagnosed with advanced cancer.

(v) **Gender role**, will be measured (*at baseline only*) with the Traditional Masculinity-Femininity (TMF) scale.[79] The TMF is a 6-item scale that assesses the degree to which people view their interests, selves, behaviour, and other aspects as masculine or feminine. It has been validated in multiple cultural and age-group contexts.[80]

## Sample size

### Quantitative

Our sample size calculation for determining TS prevalence in FCs is based on the following established formula[81] to estimate sample sizes for descriptive studies:

$$n = \frac{Z^2 P(1 - P)}{d^2}$$

where  $n$  = sample size,  $Z$  =  $Z$  statistic for confidence level,  $P$  = expected prevalence, and  $d$  = level of precision. Based on previous prevalence estimates of TS in our adult sample of patients with AL (i.e., 14% meeting criteria for ASD as measured with the SASRQ)[4] and the 11.8% PTSD prevalence in FCs of solid tumor patients,[48] we have conservatively set our expected prevalence to .14,  $Z$  to 1.96, and  $d$  to .05 (an appropriate precision for the expected prevalence[81]). The necessary sample size is 185. Our anticipated attrition rate is 15% based on previous longitudinal research at our study sites.[5,82] To compensate for attrition, the enrollment of at least 213 FCs is required to achieve our objective of determining TS prevalence in FCs. Based on expected new AL cases at both sites we can feasibly recruit 223 within our 36-month recruitment period and will therefore aim for this target.

We will also use multi-level modelling (MLM) as a non-machine learning (ML) benchmark model to determine potential TS predictors and have therefore calculated a power estimate for  $N=185$  using GLIMMPSE version 3 online software,[83,84] which performs power and sample size calculations for multilevel designs. We derived power estimates for the following parameters, with the SASRQ total score as the outcome: a design with eight groups (i.e., to reflect crossing of caregiver gender [categorical predictor; female/male], patient age [continuous predictor; younger/older], and attachment security [continuous predictor; lower/higher] as the possible main three MLM predictors of interest) and six timepoints; decreasing intercorrelation across repeated measures, from .60 to .52; and mean and SD scaling factors of 1 and 1.5, to account for uncertainty about observed means and SDs. Power estimates were calculated for each two-way predictor x time interaction as the main hypothesis tested. Entered mean and SD estimates for the SASRQ were based on estimates from a recent phase II longitudinal clinical trial of a psychological-palliative care intervention for patients with acute leukemia.[1] The ranges of computed power estimates for a calculated sample size of 184 are: for caregiver gender x time, .34–.89 (power

1  
2  
3 estimate for means and SDs without scaling=.51); for attachment security x time, .81–1.00 (power  
4 estimate without scaling=.95); and for patient age x time, .85–1.00 (power without scaling=.97).  
5

### 6 Qualitative

7 Our interview sample size will be determined by data saturation. Based on our previous qualitative  
8 work and our heterogenous sample, we estimate that a purposeful subgroup of 30 FCs will  
9 participate in interviews at the 3, 6, and 12-month timepoints.[85-88]  
10  
11

### 12 Analysis

#### 13 Quantitative

14 All quantitative analyses will be conducted with R software and alpha will be set to .05.[89]  
15 Descriptive statistics will be used for FC sociodemographic and patient medical characteristics.  
16 We will descriptively characterize the prevalence and severity (with variability) of TS symptoms.  
17  
18

19 A broad range of candidate predictors of TS symptoms have been identified.[90] However, the  
20 heterogeneity of risk factors, the clinical appearance, and etiology of TS hampers the analysis of  
21 risk factors using traditional regression models.[91] The high dimensionality and likely  
22 multicollinearity among predictors and interaction of predictors pose challenges for statistical  
23 models and require the application of advanced computational approaches.[92] Studies using  
24 advanced ML have been developed to examine predictors of psychiatric risk such as PTSD risk  
25 and to facilitate the implementation of precision psychiatry into clinical practice.[93-98] We will  
26 use a supervised ML approach that is based on well-established methodologies in clinical  
27 prediction modelling including data pre-processing, such as handling of missing values, guarding  
28 against “overfitting”, and rigorous model evaluation in terms of established metrics for  
29 discrimination and calibration.[99-104] Confidence intervals for all point estimates will be  
30 calculated to communicate uncertainty of the model. Moreover, to assess the generalization ability  
31 of the model on data not used to develop the model, we will partition the data to perform a held-  
32 out validation test.[104,105]  
33  
34  
35

36 We will use latent growth mixture modelling (LGMM) to identify heterogeneous longitudinal  
37 trajectories of TS response.[106] Individuals will be assigned to trajectories based on their most  
38 likely class membership. The best-fitting model will be selected based on the Information Criteria  
39 [Akaike Information Criteria (AIC), Bayesian Information Criteria (BIC), and Sample Size  
40 Adjusted Bayesian Information Criteria (SSBIC)], along with fit statistics (such as the Bootstrap  
41 Log Likelihood Test), as well as parsimony and interpretability consistent with recommendations  
42 from the literature.[107,108] We will test diverse predictive models for robustness in predicting  
43 LGMM trajectories, including random forest (RF) and support vector machines (SVM). As the  
44 final model, we will select the simplest model within one standard error of the best model to allow  
45 for a more parsimonious model. We will benchmark our predictive model with computational  
46 simpler models (including MLM). Predictors included in our models will be FC age, sex, gender,  
47 gender role, family income, baseline attachment security, perceived social support, caregiver  
48 burden, and satisfaction with provided care, relationship to patient, and patient age and treatment  
49 response. We will use Explainable Machine Learning using SHAP (SHapley Additive  
50 exPlanation)[109] to identify those features that are mainly responsible for driving the individual  
51 outcome prediction. It is an additive feature attribution method that uses kernel functions and a  
52  
53  
54  
55  
56  
57  
58  
59

1  
2  
3 well-established method to interpret ML models.[109] We will also use SHAP dependence plots  
4 to examine potential interactions among the three most important predictors in the ML model.  
5

6 We will confirm our predictor-related findings using MLM, which permits cases with missing data  
7 to be included in longitudinal modeling. In this case, we will use the three most important  
8 predictors to prevent “overfitting”, identified in the ML approach to test for direct linear  
9 relationships. The main effects of each of these predictors, their individual interactions with Time,  
10 and their random effects will be examined. Sociodemographic and medical covariates, including  
11 disease type (ALL vs. AML) and depressive symptoms, will be entered to control for their effects.  
12  
13

### 14 Qualitative

15 All interview audio-recordings will be transcribed verbatim by a trained transcriptionist, verified  
16 for accuracy, de-identified to protect privacy, and imported, along with field notes, into NVivo  
17 software[110] for data management and analysis. Consistent with a constant comparative method,  
18 data analyses will begin once the first interview has been transcribed, allowing data from early  
19 interviews to inform later interviews.[111] Data will be independently coded in duplicate using a  
20 line-by-line approach by trained qualitative analysts using a coding tree developed using the team’s  
21 expertise and the TS scientific literature. Using content analysis, codes will be grouped into  
22 categories based on between-code relationships and categories will then be grouped into themes  
23 according to the predictors and longitudinal course of TS symptoms.[112,113] Categories and  
24 themes will then be compared across FC traits to understand similarities and differences in  
25 experiences depending on these characteristics. Quantitative data will be integrated into the  
26 analysis process to illustrate or clarify qualitative results related to the FC experience using a mixed  
27 methods matrix approach.[114] Any discrepancies in opinion regarding coding will be resolved  
28 using arbitration with our study team and such meetings will occur regularly at data analysis review  
29 meetings. An audit trail consisting of a detailed chronology of data collection and analytical  
30 decisions will be kept to enhance validity.[115]  
31  
32  
33  
34

## 35 ETHICS AND DISSEMINATION

### 36 Ethics

37 The study received provincial approval from the Ontario Research Ethics Board (CTO Project ID:  
38 2104) on July 22, 2021, and centre approval for both sites in October, 2021. Institutional  
39 Authorization was provided by both sites in November, 2021.  
40  
41

### 42 Dissemination

43 We have designed an evidence-based dissemination strategy aimed at increasing awareness and  
44 knowledge of the psychological risks to FCs of patients with AL,[116] as well as FC- and patient-  
45 level factors associated with these risks, to inform scientific investigation in the field and change  
46 point-of-care practice. Our dissemination strategy will include the presentation of results at major  
47 psychosocial and medical oncology conferences, publications in leading medical or oncology  
48 journals, and postings on key websites such as the Global Institute of Psychosocial, Palliative and  
49 End-of-Life Care (GIPPEC; www.gippec.org) based at the Princess Margaret Cancer Centre and  
50 the University of Toronto, affiliated hospitals and universities, and via our collaborative  
51 partnerships with local, national, and international oncology groups. The following materials will  
52 also be developed and disseminated: (i) a 1-page brochure for oncology HCPs at adult and pediatric  
53 centres; (ii) a 3-minute YouTube video; (iii) media releases; and (iv) fact sheets to support patients  
54  
55  
56  
57  
58  
59

1  
2  
3 and FCs across Canada to advocate for policy change, if warranted. Furthermore, specific  
4 implications pertaining to FC subgroups (e.g., those differing across sex, gender, ethnicity,  
5 caregiver role, etc.) will be highlighted in manuscripts and other knowledge translation efforts to  
6 bolster impacts across the diversity of FCs.  
7

### 8 9 **Conclusion**

10 The present mixed methods, longitudinal study of the psychological impact on FCs of individuals  
11 diagnosed with AL across the life cycle is the first of its kind and will provide a comprehensive  
12 understanding of the FC lived experience and subjective distress, as well as associated supportive  
13 care needs. The quantitative and qualitative results will inform the development of a tailored  
14 psychosocial intervention to prevent or alleviate TS in this high-risk population and have the  
15 potential to be applied to other life-threatening medical conditions.  
16  
17

### 18 **Acknowledgements**

19 The authors thank research coordinators Elham Hashemi at the Hospital for Sick Children, and  
20 Kyle Fitzgibbon at the Princess Margaret Cancer Centre, for their continued support of this  
21 project.  
22  
23

### 24 **Authors' contributions**

25 GR and LJ are co-principal investigators. GR, LJ, SA, AR, and CM conceptualised, wrote, and  
26 approved the final protocol, and revised and approved the final manuscript for submission. SG,  
27 AS, CZ, SH, RN, and CM contributed to the writing of the original protocol, as did KS and KM,  
28 who also conducted the sample size calculations and wrote the statistical analysis sections. SN  
29 revised the protocol and wrote manuscript for submission. All authors read and approved the final  
30 version.  
31  
32

33 **Funding statement** This work was supported by a project grant from the Canadian Institutes of  
34 Health Research (CIHR) grant number PJT 173255.  
35  
36

37 **Competing interests** ADS has received research funding from Takeda Pharmaceuticals, BMS and  
38 Medivir AB, and consulting fees/honorarium from Takeda, Novartis, Jazz, and Otsuka  
39 Pharmaceuticals. ADS is named on a patent application for the use of DNT cells to treat AML.  
40  
41  
42  
43  
44  
45  
46  
47  
48  
49  
50  
51  
52  
53  
54  
55  
56  
57  
58  
59  
60



## REFERENCES

1. Rodin G, Malfitano C, Rydall A, et al. Emotion and Symptom-focused Engagement (EASE): a randomized phase II trial of an integrated psychological and palliative care intervention for patients with acute leukemia. *Support Care Cancer* 2020;28(1):163-76. doi:10.1007/s00520-019-04723-2 [published Online First: 17 April 2019].
2. Zimmermann C, Yuen D, Mischitelle A, et al. Symptom burden and supportive care in patients with acute leukemia. *Leuk Res* 2013;37(7):731-6. doi: 10.1016/j.leukres.2013.02.009 [published Online First: 11 March 2013]
3. Shaulov A, Rodin G, Popovic G, et al. Pain in patients with newly diagnosed or relapsed acute leukemia. *Supp Care Cancer* 2019;27(8):2789-97. doi: 10.1007/s00520-018-4583-5 [published Online First: 8 December 2018]
4. Rodin G, Yuen D, Mischitelle A, et al. Traumatic stress in acute leukemia. *Psychooncology* 2013;22(2):299-307. doi:10.1002/pon.2092 [published Online First: 13 November 2011]
5. Rodin G, Deckert A, Tong E, et al. Traumatic stress in patients with acute leukemia: a prospective cohort study. *Psychooncology* 2018;27(2):515-23. doi:10.1002/pon.4488 [published Online First: 10 August 2017].
6. Baker KS, Ness KK, Weisdorf D, et al. Late effects in survivors of acute leukemia treated with hematopoietic cell transplantation: a report from the Bone Marrow Transplant Survivor Study. *Leukemia* 2010;24(12):2039-47. doi:10.1038/leu.2010.210 [published Online First: 23 September 2010].
7. Kazak AE, Hwang W-T, Chen FF, et al. Screening for family psychosocial risk in pediatric cancer: validation of the Psychosocial Assessment Tool (PAT) Version 3. *J Pediatr Psychol* 2018;43(7):737-48. doi:10.1093/jpepsy/jsy012
8. Richardson AE, Morton RP, Broadbent EA. Illness perceptions and coping predict post-traumatic stress in caregivers of patients with head and neck cancer. *Support Care Cancer* 2016;24(10):4443-50. doi:10.1007/s00520-016-3285-0 [published Online First: 30 May 2016].
9. Wadhwa D, Burman D, Swami N, et al. Quality of life and mental health in caregivers of outpatients with advanced cancer. *Psychooncology* 2013;22(2):403-10. doi:10.1002/pon.2104 [published Online First: 2 December 2011].
10. Gibson TM, Mostoufi-Moab S, Stratton KL, et al. Temporal patterns in the risk of chronic health conditions in survivors of childhood cancer diagnosed 1970–99: a report from the Childhood Cancer Survivor Study cohort. *Lancet Oncol* 2018;19(12):1590-1601. doi:10.1016/S1470-2045(18)30537-0 [published Online First: 8 November 2018].
11. Mulrooney DA, Hyun G, Ness KK, et al. The changing burden of long-term health outcomes in survivors of childhood acute lymphoblastic leukaemia: a retrospective analysis of the St Jude Lifetime Cohort Study. *Lancet Haematol* 2019;6(6):e306-e316. doi:10.1016/S2352-3026(19)30050-X [published Online First: 8 May 2019].
12. Timilshina N, Breunis H, Tomlinson GA, et al. Long-term recovery of quality of life and physical function over three years in adult survivors of acute myeloid leukemia after intensive chemotherapy. *Leukemia* 2019;33(1):15-25. doi:10.1038/s41375-018-0162-5 [published Online First: 8 June 2018].
13. Leung W, Hudson MM, Strickland DK, et al. Late effects of treatment in survivors of childhood acute myeloid leukemia. *J Clin Oncol* 2000;18(18):3273-9. doi:10.1200/JCO.2000.18.18.3273

14. van der Does-van den Berg A, de Vaan GA, van Weerden JF, et al. Late effects among long-term survivors of childhood acute leukemia in The Netherlands: a Dutch Childhood Leukemia Study Group Report. *Pediatr Res* 1995;38(5):802-7. doi:10.1203/00006450-199511000-00027
15. Geng HM, Chuang DM, Yang F, et al. Prevalence and determinants of depression in caregivers of cancer patients: a systematic review and meta-analysis. *Medicine (Baltimore)* 2018;97(39):e11863. doi:10.1097/MD.00000000000011863
16. Mohammed S, Swami N, Pope A, et al. "I didn't want to be in charge and yet I was": bereaved caregivers' accounts of providing home care for family members with advanced cancer. *Psychooncology* 2018;27(4):1229-36. doi:10.1002/pon.4657 [published Online First: 1 March 2018]
17. Burge F, Lawson B, Johnston G. Trends in the place of death of cancer patients, 1992-1997. *CMAJ* 2003;168(3):265-70. PMID: 12566330
18. Boyle D, Blodgett L, Gnesdiloff S, et al. Caregiver quality of life after autologous bone marrow transplantation. *Cancer Nurs* 2000;23(3):193-203; quiz 204-5. doi:10.1097/00002820-200006000-00006
19. Cain R, MacLean M, Sellick S. Giving support and getting help: informal caregivers' experiences with palliative care services. *Palliat Support Care* 2004;2(3):265-72. doi:10.1017/s1478951504040350
20. Glajchen M. The emerging role and needs of family caregivers in cancer care. *J Support Oncol* 2004;2(2):145-55. PMID: 15328817
21. Manne S. Cancer in the marital context: a review of the literature. *Cancer Invest* 1998;16(3):188-202. doi:10.3109/07357909809050036
22. Nijboer C, Tempelaar R, Sanderman R, et al. Cancer and caregiving: the impact on the caregiver's health. *Psychooncology* 1998;7(1):3-13. doi:10.1002/(SICI)1099-1611(199801/02)7:1<3::AID-PON320>3.0.CO;2-5
23. Pitceathly C, Maguire P. The psychological impact of cancer on patients' partners and other key relatives: a review. *Eur J Cancer* 2003;39(11):1517-24. doi:10.1016/s0959-8049(03)00309-5
24. Halpern MT, Fiero MH, Bell ML. Impact of caregiver activities and social supports on multidimensional caregiver burden: analyses from nationally-representative surveys of cancer patients and their caregivers. *Qual Life Res* 2017;26(6):1587-95. doi:10.1007/s11136-017-1505-9 [published Online First: 16 February 2017]
25. Williams AM, Wang L, Kitchen P. Differential impacts of care-giving across three caregiver groups in Canada: end-of-life care, long-term care and short-term care. *Health Soc Care Community* 2014;22(2):187-96. doi:10.1111/hsc.12075 [published Online First: 31 October 2013]
26. Schrank B, Ebert-Vogel A, Amering M, et al. Gender differences in caregiver burden and its determinants in family members of terminally ill cancer patients. *Psychooncology* 2016;25(7):808-14. doi:10.1002/pon.4005 [published Online First: 18 October 2015]
27. Shaffer KM, Jacobs JM, Nipp RD, et al. Mental and physical health correlates among family caregivers of patients with newly-diagnosed incurable cancer: a hierarchical linear regression analysis. *Support Care Cancer* 2017;25(3):965-71. doi:10.1007/s00520-016-3488-4 [published Online First: 19 November 2016]
28. van Warmerdam J, Zabih V, Kurdyak P, et al. Prevalence of anxiety, depression, and posttraumatic stress disorder in parents of children with cancer: a meta-analysis. *Pediatr*



- 1  
2  
3  
4  
5  
6  
7  
8  
9  
10  
11  
12  
13  
14  
15  
16  
17  
18  
19  
20  
21  
22  
23  
24  
25  
26  
27  
28  
29  
30  
31  
32  
33  
34  
35  
36  
37  
38  
39  
40  
41  
42  
43  
44  
45  
46  
47  
48  
49  
50  
51  
52  
53  
54  
55  
56  
57  
58  
59  
60
- Blood Cancer* 2019;66(6):e27677. doi:10.1002/pbc.27677 [published Online First: 28 February 2019]
29. van Warmerdam J, Sutradhar R, Kurdyak P, et al. Long-term mental health outcomes in mothers and siblings of children with cancer: a population-based, matched cohort study. *J Clin Oncol* 2020;38(1):51-62. doi:10.1200/JCO.19.01382 [published Online First: 12 November 2019]
30. Liang J, Lee SJ, Storer BE, et al. Rates and risk factors for post-traumatic stress disorder symptomatology among adult hematopoietic cell transplant recipients and their informal caregivers. *Biol Blood Marrow Transplant* 2019;25(1):145-50. doi:10.1016/j.bbmt.2018.08.002 [published Online First: 9 August 2018]
31. American Psychiatric Association. Diagnostic and Statistical Manual of Mental Disorders, Fifth Edition (DSM-5). Washington, DC: American Psychiatric Association Publishing 2013.
32. Spiegel D. Treatment of acute traumatic stress reactions. *J Trauma Dissociation* 2005;6(2):101-8. doi:10.1300/J229v06n02\_09
33. Shalev A, Liberzon I, Marmar C. Post-traumatic stress disorder. *N Engl J Med* 2017;376(25):2459-69. doi:10.1056/NEJMra1612499
34. Kessler RC, Sonnega A, Bromet E, et al. Posttraumatic stress disorder in the National Comorbidity Survey. *Arch Gen Psychiatry* 1995;52(12):1048-60. doi:10.1001/archpsyc.1995.03950240066012
35. Street AE, Dardis CM. Using a social construction of gender lens to understand gender differences in posttraumatic stress disorder. *Clin Psychol Rev* 2018;66:97-105. doi:10.1016/j.cpr.2018.03.001 [published Online First: 9 March 2018]
36. Kimerling R, Allen MC, Duncan LE. Chromosomes to social contexts: sex and gender differences in PTSD. *Curr Psychiatry Rep* 2018;20(12):114. doi:10.1007/s11920-018-0981-0
37. Gradus JL, Qin P, Lincoln AK, et al. Acute stress reaction and completed suicide. *Int J Epidemiol* 2010;39(6):1478-84. doi:10.1093/ije/dyq112 [published Online First: 12 July 2010]
38. Ryder AL, Azcarate PM, Cohen BE. PTSD and physical health. *Curr Psychiatry Rep* 2018;20(12):116. doi:10.1007/s11920-018-0977-9
39. Schlenger WE, Corry NH, Williams CS, et al. A prospective study of mortality and trauma-related risk factors among a nationally representative sample of Vietnam veterans. *Am J Epidemiol* 2015;182(12):980-90. doi:10.1093/aje/kwv217
40. Chen SC, Lai YH, Liao CT, et al. Unmet supportive care needs and characteristics of family caregivers of patients with oral cancer after surgery. *Psychooncology* 2014;23(5):569-77. doi:10.1002/pon.3458 [published First Online: 8 January 2014]
41. Vogt D, Erbes CR, Polusny MA. Role of social context in posttraumatic stress disorder (PTSD). *Curr Opin Psychol* 2017;14:138-42. doi:10.1016/j.copsyc.2017.01.006
42. Watson P. PTSD as a public mental health priority. *Curr Psychiatry Rep* 2019;21(7):61. doi:10.1007/s11920-019-1032-1
43. Goldberg S. Attachment and Development. Part of: Texts in Developmental Psychology Series. New York, NY: Routledge 2000.
44. Mikulincer M, Shaver PR, Solomon Z. An attachment perspective on traumatic and posttraumatic reactions. In: Safir MP, Wallach HS, Rizzo AS, eds. *Future Directions in Post-Traumatic Stress Disorder*. New York, NY: Springer 2015:79-96.

- 1
- 2
- 3
- 4 45. Zhang F, Labouvie-Vief G. Stability and fluctuation in adult attachment style over a 6-
- 5 year period. *Attach Hum Dev* 2004;6(4):419-37. doi:10.1080/1461673042000303127
- 6 46. Lo C, Walsh A, Mikulincer M, et al. Measuring attachment security in patients with
- 7 advanced cancer: psychometric properties of a modified and brief Experiences in Close
- 8 Relationships scale. *Psychooncology* 2009;18(5):490-9. doi:10.1002/pon.1417
- 9 47. Willis E, Mah K, Shapiro GK, et al. Testing terror management theory in advanced
- 10 cancer. *Death Stud* Published Online First: 27 December 2021;1-10.
- 11 doi:10.1080/07481187.2021.2019145
- 12 48. Moschopoulou E, Hutchison I, Bhui K, et al. Post-traumatic stress in head and neck
- 13 cancer survivors and their partners. *Support Care Cancer* 2018;26(9):3003-11.
- 14 doi:10.1007/s00520-018-4146-9 [published Online First: 15 March 2018]
- 15 49. Unsel M, Krammer K, Lubowitzki S, et al. Screening for post-traumatic stress disorders
- 16 in 1017 cancer patients and correlation with anxiety, depression, and distress.
- 17 *Psychooncology* 2019;28(12):2382-8. doi:10.1002/pon.5239 [published 3 November
- 18 2019]
- 19 50. Kim Y, Mitchell HR, Ting A. Application of psychological theories on the role of gender
- 20 in caregiving to psycho-oncology research. *Psychooncology* 2019;28(2):228-54.
- 21 doi:10.1002/pon.4953 [published Online First: 27 December 2018]
- 22 51. Segrin C, Badger TA, Sikorskii A, et al. A dyadic analysis of stress processes in Latinas
- 23 with breast cancer and their family caregivers. *Psychooncology* 2018;27(3):838-46.
- 24 doi:10.1002/pon.4580 [published Online First: 29 November 2017]
- 25 52. Burnette D, Duci V, Dhembo E. Psychological distress, social support, and quality of life
- 26 among cancer caregivers in Albania. *Psychooncology* 2017;26(6):779-86.
- 27 doi:10.1002/pon.4081 [published Online First: 26 January 2016]
- 28 53. Deniz H, Inci F. The burden of care and quality of life of caregivers of leukemia and
- 29 lymphoma patients following peripheric stem cell transplantation. *J Psychosoc Oncol*
- 30 2015;33(3):250-62. doi:10.1080/07347332.2015.1019660
- 31 54. Shahi V, Lapid MI, Kung S, et al. Do age and quality of life of patients with cancer
- 32 influence quality of life of the caregiver? *J Geriatr Oncol* 2014;5(3):331-6.
- 33 doi:10.1016/j.jgo.2014.03.003 [published Online First: 14 April 2014]
- 34 55. Juth V, Silver RC, Sender L. The shared experience of adolescent and young adult cancer
- 35 patients and their caregivers. *Psychooncology* 2015;24(12):1746-53.
- 36 doi:10.1002/pon.3785 [published Online First: 25 March 2015]
- 37 56. Alam S, Hannon B, Zimmermann C. Palliative care for family caregivers. *J Clin Oncol*
- 38 2020;38(9):926-36. doi:10.1200/JCO.19.00018 [published Online First: 5 February 2020]
- 39 57. Tang ST, Chang WC, Chen JS, et al. Course and predictors of depressive symptoms
- 40 among family caregivers of terminally ill cancer patients until their death.
- 41 *Psychooncology* 2013;22(6):1312-8. doi:10.1002/pon.3141 [published Online First: 27
- 42 July 2012]
- 43 58. Braun M, Mikulincer M, Rydall A, et al. Hidden morbidity in cancer: spouse caregivers.
- 44 *J Clin Oncol* 2007;25(30):4829-34. doi:10.1200/JCO.2006.10.0909
- 45 59. Lo C, Zimmermann C, Rydall A, et al. Longitudinal study of depressive symptoms in
- 46 patients with metastatic gastrointestinal and lung cancer. *J Clin Oncol* 2010;28(18):3084-
- 47 9. doi:10.1200/JCO.2009.26.9712 [published Online First: 17 May 2010]
- 48 60. Rodin G, Lo C, Mikulincer M, et al. Pathways to distress: the multiple determinants of
- 49 depression, hopelessness, and the desire for hastened death in metastatic cancer patients.
- 50
- 51
- 52
- 53
- 54
- 55
- 56
- 57
- 58
- 59
- 60

- 1  
2  
3  
4  
5  
6  
7  
8  
9  
10  
11  
12  
13  
14  
15  
16  
17  
18  
19  
20  
21  
22  
23  
24  
25  
26  
27  
28  
29  
30  
31  
32  
33  
34  
35  
36  
37  
38  
39  
40  
41  
42  
43  
44  
45  
46  
47  
48  
49  
50  
51  
52  
53  
54  
55  
56  
57  
58  
59  
60
- Soc Sci Med* 2009;68(3):562-9. doi:10.1016/j.socscimed.2008.10.037 [published Online First: 7 December 2008]
61. El-Jawahri A, Abel GA, Traeger L, et al. Quality of life and mood of older patients with acute myeloid leukemia (AML) receiving intensive and non-intensive chemotherapy. *Leukemia* 2019;33(10):2393-2402. doi:10.1038/s41375-019-0449-1 [published Online First: 28 March 2019]
62. Cardeña E, Koopman C, Classen C, et al. Review of the Stanford Acute Stress Reaction Questionnaire (SASRQ). In: Stamm BH, ed. *Measurement of Stress, Trauma and Adaptation*. Lutherville, MD: Sidran Press 1996:293–7.
63. Lötvall R, Palmborg A, Cardeña E. A 20-years+ Review of the Stanford Acute Stress Reaction Questionnaire (SASRQ): Psychometric Properties and Findings, *J Trauma Dissociation* 2022; 6(3). doi:10.1016/j.ejtd.2022.100269
64. Cardeña E, Koopman C, Classen C, et al. Psychometric properties of the Stanford Acute Stress Reaction Questionnaire (SASRQ): a valid and reliable measure of acute stress. *J Trauma Stress* 2000;13(4):719-34. doi:10.1023/A:1007822603186
65. Cardeña E, Spiegel D. Dissociative reactions to the San Francisco Bay Area earthquake of 1989. *Am J Psychiatry* 1993;150(3):474-8. doi:10.1176/ajp.150.3.474
66. Freinkel A, Koopman C, Spiegel D. Dissociative symptoms in media eyewitnesses of an execution. *Am J Psychiatry* 1994;151(9):1335-9. doi:10.1176/ajp.151.9.1335
67. Weathers FW, Litz BT, Keane TM, et al. The PTSD Checklist for DSM-5 (PCL-5). Scale available from the National Center for PTSD at [www.ptsd.va.gov](http://www.ptsd.va.gov); 2013. (accessed 7 March 2022).
68. Blevins CA, Weathers FW, Davis MT, et al. The Posttraumatic Stress Disorder Checklist for DSM-5 (PCL-5): development and initial psychometric evaluation. *J Trauma Stress* 2015;28(6):489-98. doi:10.1002/jts.22059 [published Online First: 25 November 2015].
69. Bovin MJ, Marx BP, Weathers FW, et al. Psychometric properties of the PTSD Checklist for Diagnostic and Statistical Manual of Mental Disorders–Fifth Edition (PCL-5) in veterans. *Psychol Assess* 2016;28(11):1379-91. doi:10.1037/pas0000254 [published Online First: 14 December 2015]
70. Wortmann JH, Jordan AH, Weathers FW, et al. Psychometric analysis of the PTSD Checklist-5 (PCL-5) among treatment-seeking military service members. *Psychol Assess* 2016;28(11):1392-1403. doi:10.1037/pas0000260 [published Online First: 11 January 2016]
71. Kroenke K, Spitzer RL, Williams JB. The PHQ-9: validity of a brief depression severity measure. *J Gen Intern Med* 2001;16(9):606-13. doi:10.1046/j.1525-1497.2001.016009606.x
72. Lo C, Hales S, Rydall A, et al. Managing Cancer and Living Meaningfully: study protocol for a randomized controlled trial. *Trials* 2015;16(1):391. doi:10.1186/s13063-015-0811-1
73. Rodin G, Lo C, Rydall A, et al. Managing Cancer and Living Meaningfully (CALM): a randomized controlled trial of a psychological intervention for patients with advanced cancer. *J Clin Oncol* 2018;36(23):2422-32. doi:10.1200/JCO.2017.77.1097 [published Online First: 29 June 2018]
74. Nijboer C, Triemstra M, Tempelaar R, et al. Measuring both negative and positive reactions to giving care to cancer patients: psychometric qualities of the Caregiver

- Reaction Assessment (CRA). *Soc Sci Med* 1999;48(9):1259-69. doi:10.1016/s0277-9536(98)00426-2
75. The ENRICHD Investigators (Berkman LF, Carney R, Blumenthal J, et al.). Enhancing recovery in coronary heart disease patients (ENRICHD): study design and methods. *Am Heart J* 2000;139(1 Pt 1):1-9. doi:10.1016/s0002-8703(00)90301-6
76. Zhou ES, Penedo FJ, Lewis JE, et al. Perceived stress mediates the effects of social support on health-related quality of life among men treated for localized prostate cancer. *J Psychosom Res* 2010;69(6):587-90. doi:10.1016/j.jpsychores.2010.04.019 [published Online First: 1 September 2010]
77. Pailler ME, Johnson TM, Kuszczak S, et al. Adjustment to acute leukemia: the impact of social support and marital satisfaction on distress and quality of life among newly diagnosed patients and their caregivers. *J Clin Psychol Med Settings* 2016;23(3):298-309. doi:10.1007/s10880-016-9459-6
78. Kristjanson LJ. Validity and reliability testing of the FAMCARE scale: measuring family satisfaction with advanced cancer care. *Soc Sci Med* 1993;36(5):693-701. doi:10.1016/0277-9536(93)90066-d
79. Kachel S, Steffens MC, Niedlich C. Traditional masculinity and femininity: validation of a new scale assessing gender roles. *Front Psychol* 2016;7:956. doi:10.3389/fpsyg.2016.00956. eCollection 2016.
80. Nascimento M, Kosminsky M, Colares V, et al. Translation and cross-cultural adaptation of Traditional Masculinity and Femininity Scale (TMF-s) for use with Brazilian university students. *J Health Sci* 2019;21(3):260-3. doi:http://dx.doi.org/10.17921/2447-8938.2019v21n3p260-263
81. Naing L, Winn T, Rusli BN. Practical issues in calculating the sample size for prevalence studies. *Archives of Orofacial Sciences* 2006;1:9-14.
82. Barrera M, Hancock K, Atenafu E, et al. Quality of life in pediatric oncology patients, caregivers and siblings after psychosocial screening: a randomized controlled trial. *Support Care Cancer* 2020;28(8):3659-68. doi:10.1007/s00520-019-05160-x [published Online First: 6 December 2019]
83. Kreidler SM, Muller KE, Grunwald GK, et al. GLIMPSE: online power computation for linear models with and without a baseline covariate. *J Stat Softw* 2013;54(10):i10. doi:10.18637/jss.v054.i10
84. Guo Y, Logan HL, Glueck DH, et al. Selecting a sample size for studies with repeated measures. *BMC Med Res Methodol* 2013;13(1):100. doi:10.1186/1471-2288-13-100.
85. Rennie DL, Nissim R. The grounded theory method and humanistic psychology. In: Schneider KJ, Pierson JF, Bugental JFT, eds. *The Handbook of Humanistic Psychology: Theory, Research, and Practice, Second Edition*. Thousand Oaks, CA: Sage Publications 2015;297-307. <https://us.sagepub.com/en-us/nam/the-handbook-of-humanistic-psychology/book238925>
86. Nissim R, Gagliese L, Rodin G. The desire for hastened death in individuals with advanced cancer: a longitudinal qualitative study. *Soc Sci Med*. 2009;69(2):165-71. doi:10.1016/j.socscimed.2009.04.021 [published Online First: 29 May 2009]
87. Nissim R, Rodin G, Schimmer A, et al. Finding new bearings: a qualitative study on the transition from inpatient to ambulatory care of patients with acute myeloid leukemia. *Support Care Cancer* 2014;22(9):2435-43. doi:10.1007/s00520-014-2230-3 [published Online First: 5 April 2014]



- 1  
2  
3 88. Nissim R, Zimmermann C, Minden M, et al. Abducted by the illness: a qualitative study  
4 of traumatic stress in individuals with acute leukemia. *Leuk Res* 2013;37(5):496-502.  
5 doi:10.1016/j.leukres.2012.12.007 [published Online First: 24 January 2013]  
6  
7 89. R Core Team (2013). R: A language and environment for statistical computing. R  
8 Foundation for Statistical Computing, Vienna, Austria. URL <http://www.R-project.org/>.  
9  
10 90. Shalev AY, Liberzon I, Marmar C. Post-traumatic stress disorder. *NEJM*  
11 2017;376(25):2459-2469.  
12  
13 91. Schultebraucks K, Galatzer-Levy IR. Machine learning for prediction of posttraumatic  
14 stress and resilience following trauma: an overview of basic concepts and recent  
15 advances. *J Trauma Stress* 2019;32(2):215-225.  
16  
17 92. Huys QJM, Maia TV, Frank MJ. Computational psychiatry as a bridge from neuroscience  
18 to clinical applications. *Nat Neurosci* 2016;19(3):404-413.  
19  
20 93. Schultebraucks K, Shalev AY. Precision Psychiatry Approach to Posttraumatic Stress  
21 Response. *Psychiat Ann* 2021;51(1):7-13.  
22  
23 94. Schultebraucks K, Sijbrandij M, Galatzer-Levy IR, et al. Forecasting individual risk for  
24 long-term Posttraumatic Stress Disorder in emergency medical settings using biomedical  
25 data: A machine learning multicenter cohort study. *Neurobiol Stress* 2021;14:100297.  
26 doi: 10.1016/j.ynstr.2021.100297.  
27  
28 95. Schultebraucks K, Shalev AY, Michopoulos V, et al. A Validated Predictive Algorithm  
29 of Posttraumatic Stress Course following Emergency Department Admission after a  
30 Traumatic Stressor. *Nat Med* 2020;26(7):1084-1088.  
31  
32 96. Schultebraucks K, Qian M, Abu-Amara D, et al. Pre-deployment risk factors for PTSD in  
33 active-duty personnel deployed to Afghanistan: a machine-learning approach for  
34 analyzing multivariate predictors. *Mol Psychiatry* 2021;26:5011–5022.  
35  
36 97. Schultebraucks K, Choi KW, Galatzer-Levy IR, et al. Discriminating heterogeneous  
37 trajectories of resilience and depression after major life stressors using polygenic scores.  
38 *JAMA Psychiatry* 2021;78(7):744-752. doi:10.1001/jamapsychiatry.2021.0228  
39  
40 98. Schultebraucks K, Ben-Zion Z, Admon R, et al. Assessment of early neurocognitive  
41 functioning increases the accuracy of predicting chronic PTSD risk. *Mol Psychiatry*  
42 2022;27:2247–2254.  
43  
44 99. Collins GS, Reitsma JB, Altman DG, et al. Transparent Reporting of a multivariable  
45 prediction model for Individual Prognosis or Diagnosis (TRIPOD): the TRIPOD  
46 Statement. *Br J Surg* 2015;102(3):148-58. doi:10.1002/bjs.9736  
47  
48 100. Hemingway H, Croft P, Perel P, et al. Prognosis Research Strategy (PROGRESS) 1: a  
49 framework for researching clinical outcomes. *BMJ* 2013;346:e5595.  
50 doi:10.1136/bmj.e5595  
51  
52 101. Moons KGM, Altman DG, Reitsma JB, et al. New guideline for the reporting of studies  
53 developing, validating, or updating a multivariable clinical prediction model: the  
54 TRIPOD Statement. *Adv Anat Pathol* 2015;22(5):303-5.  
55 doi:10.1097/PAP.000000000000072  
56  
57 102. Steyerberg EW, Moons KGM, van der Windt DA, et al. Prognosis Research Strategy  
58 (PROGRESS) 3: prognostic model research. *PLoS Med* 2013;10(2): e1001381.  
59 doi:10.1371/journal.pmed.1001381 [published Online First: 5 February 2013]  
60

- 1  
2  
3 103. Cawley GC, Talbot NLC. On over-fitting in model selection and subsequent selection  
4 bias in performance evaluation. *J Mach Learn Res* 2010;11:2079-2107.  
5 <https://www.jmlr.org/papers/volume11/cawley10a/cawley10a.pdf>  
6  
7 104. Steyerberg EW, Harrell Jr FE. Prediction models need appropriate internal, internal-  
8 external, and external validation. *J Clin Epidemiol* 2016;69:245-7.  
9 doi:10.1016/j.jclinepi.2015.04.005 [published Online First: 18 April 2015]  
10  
11 105. Kuhn M, Johnson K. Applied Predictive Modeling. New York, NY: Springer; 2013.  
12 <https://link.springer.com/book/10.1007/978-1-4614-6849-3?page=2#toc>  
13  
14 106. Carlson LE, Bultz BD, Specia M, et al. Partners of cancer patients: I. Impact, adjustment,  
15 and coping across the illness trajectory. *J Psychosoc Oncol* 2000;18(2):39-63.  
16 [https://psycnet.apa.org/doi/10.1300/J077v18n02\\_03](https://psycnet.apa.org/doi/10.1300/J077v18n02_03)  
17  
18 107. Muthén LK, Muthén BO. Mplus User's Guide: Statistical Analysis with Latent Variables,  
19 Eighth Edition. Los Angeles, CA: Muthén & Muthén 1998-2017.  
20 [https://www.statmodel.com/download/usersguide/MplusUserGuideVer\\_8.pdf](https://www.statmodel.com/download/usersguide/MplusUserGuideVer_8.pdf)  
21  
22 108. van de Schoot R, Sijbrandij M, Winter SD, et al. The GRoLTS-Checklist: guidelines for  
23 reporting on latent trajectory studies. *Struct Equ Modeling* 2017;24(3):451-67.  
24 doi:10.1080/10705511.2016.1247646  
25  
26 109. Lundberg SM, Lee SI. A unified approach to interpreting model predictions. In: Guyon I,  
27 Luxburg UV, Bengio S, Wallach H, Fergus R, Vishwanathan S, Garnett R, eds. Advances  
28 in Neural Information Processing Systems 30 (NIPS 2017) 2017:4765-74.  
29 [https://papers.nips.cc/paper/2017/hash/8a20a8621978632d76c43dfd28b67767-  
30 Abstract.html](https://papers.nips.cc/paper/2017/hash/8a20a8621978632d76c43dfd28b67767-Abstract.html)  
31  
32 110. QSR International Pty Ltd. (2020) NVivo (released in March 2020),  
33 <https://www.qsrinternational.com/nvivo-qualitative-data-analysis-software/home>  
34  
35 111. Lingard L, Albert M, Levinson W. Qualitative research: grounded theory, mixed  
36 methods, and action research. *BMJ (Clinical Research ed.)* 2008;337:a567.  
37 doi:10.1136/bmj.39602.690162.47  
38  
39 112. Sandelowski M. What's in a name? Qualitative description revisited. *Res Nurs Health*  
40 2010;33(1):77-84. doi:10.1002/nur.20362  
41  
42 113. Sandelowski M. Whatever happened to qualitative description? *Res Nurs Health*  
43 2000;23(4):334-40. doi:10.1002/1098-240x(200008)23:4<334::aid-nur9>3.0.co;2-g  
44  
45 114. O'Cathain A, Murphy E, Nicholl J. Three techniques for integrating data in mixed  
46 methods studies. *BMJ (Clinical Research ed.)* 2010;341:c4587. doi:10.1136/bmj.c4587  
47  
48 115. Morrow SL. Quality and trustworthiness in qualitative research in counseling  
49 psychology. *J Couns Psychol* 2005;52(2):250-60.  
50  
51 116. Grimshaw JM, Eccles MP, Lavis JN, Hill SJ, Squires JE. Knowledge translation of  
52 research findings. *Implement Sci* 2012; 7(1):50.  
53  
54  
55  
56  
57  
58  
59  
60

# BMJ Open

## Traumatic stress symptoms in family caregivers of patients with acute leukemia: protocol for a multisite mixed methods, longitudinal, observational study

|                                 |                                                                                                                                                                                                                                                                                                                                                                                                                                                                                                                                                                                                                                                                                                                                                                                                                                                                                                                                                                                                                                                                                                                                                                                                                                                                                                                                                                                                                                                                                                                    |
|---------------------------------|--------------------------------------------------------------------------------------------------------------------------------------------------------------------------------------------------------------------------------------------------------------------------------------------------------------------------------------------------------------------------------------------------------------------------------------------------------------------------------------------------------------------------------------------------------------------------------------------------------------------------------------------------------------------------------------------------------------------------------------------------------------------------------------------------------------------------------------------------------------------------------------------------------------------------------------------------------------------------------------------------------------------------------------------------------------------------------------------------------------------------------------------------------------------------------------------------------------------------------------------------------------------------------------------------------------------------------------------------------------------------------------------------------------------------------------------------------------------------------------------------------------------|
| Journal:                        | <i>BMJ Open</i>                                                                                                                                                                                                                                                                                                                                                                                                                                                                                                                                                                                                                                                                                                                                                                                                                                                                                                                                                                                                                                                                                                                                                                                                                                                                                                                                                                                                                                                                                                    |
| Manuscript ID                   | bmjopen-2022-065422.R1                                                                                                                                                                                                                                                                                                                                                                                                                                                                                                                                                                                                                                                                                                                                                                                                                                                                                                                                                                                                                                                                                                                                                                                                                                                                                                                                                                                                                                                                                             |
| Article Type:                   | Protocol                                                                                                                                                                                                                                                                                                                                                                                                                                                                                                                                                                                                                                                                                                                                                                                                                                                                                                                                                                                                                                                                                                                                                                                                                                                                                                                                                                                                                                                                                                           |
| Date Submitted by the Author:   | 14-Sep-2022                                                                                                                                                                                                                                                                                                                                                                                                                                                                                                                                                                                                                                                                                                                                                                                                                                                                                                                                                                                                                                                                                                                                                                                                                                                                                                                                                                                                                                                                                                        |
| Complete List of Authors:       | Jibb, Lindsay; The Hospital for Sick Children, Child Health Evaluative Sciences; University of Toronto, Nursing<br>Nanos, Stephanie; Princess Margaret Hospital Cancer Centre, Supportive Care; The Hospital for Sick Children, Child Health Evaluative Sciences<br>Alexander, Sarah; The Hospital for Sick Children, Haematology/Oncology; University of Toronto, Pediatrics<br>Malfitano, Carmine; Princess Margaret Hospital Cancer Centre, Supportive Care<br>Rydall, Anne; Princess Margaret Hospital Cancer Centre, Supportive Care<br>Gupta, Sumit; The Hospital for Sick Children, Haematology/Oncology; University of Toronto, Pediatrics<br>Schimmer, Aaron; Princess Margaret Hospital Cancer Centre, Medical Oncology/Hematology; University of Toronto, Medical Biophysics<br>Zimmermann, Camilla; Princess Margaret Hospital Cancer Centre, Supportive Care; University of Toronto, Psychiatry<br>Hales, Sarah; Princess Margaret Hospital Cancer Centre, Supportive Care; University of Toronto, Psychiatry<br>Nissim, Rinat; Princess Margaret Hospital Cancer Centre, Supportive Care; University of Toronto, Psychiatry<br>Marmar, Charles; New York University, Psychiatry<br>Schultebraucks, Katharina; Columbia University Irving Medical Center, Emergency Medicine; Columbia University, Psychiatry<br>Mah, Kenneth; Princess Margaret Hospital Cancer Centre, Supportive Care<br>Rodin, Gary; Princess Margaret Hospital Cancer Centre, Supportive Care; University of Toronto, Psychiatry |
| <b>Primary Subject Heading</b>: | Oncology                                                                                                                                                                                                                                                                                                                                                                                                                                                                                                                                                                                                                                                                                                                                                                                                                                                                                                                                                                                                                                                                                                                                                                                                                                                                                                                                                                                                                                                                                                           |
| Secondary Subject Heading:      | Mental health, Palliative care                                                                                                                                                                                                                                                                                                                                                                                                                                                                                                                                                                                                                                                                                                                                                                                                                                                                                                                                                                                                                                                                                                                                                                                                                                                                                                                                                                                                                                                                                     |
| Keywords:                       | Leukaemia < ONCOLOGY, Adult palliative care < PALLIATIVE CARE, Paediatric palliative care < PALLIATIVE CARE, Anxiety disorders < PSYCHIATRY, QUALITATIVE RESEARCH, MENTAL HEALTH                                                                                                                                                                                                                                                                                                                                                                                                                                                                                                                                                                                                                                                                                                                                                                                                                                                                                                                                                                                                                                                                                                                                                                                                                                                                                                                                   |
|                                 |                                                                                                                                                                                                                                                                                                                                                                                                                                                                                                                                                                                                                                                                                                                                                                                                                                                                                                                                                                                                                                                                                                                                                                                                                                                                                                                                                                                                                                                                                                                    |



1  
2  
3  
4  
5  
6  
7  
8  
9  
10  
11  
12  
13  
14  
15  
16  
17  
18  
19  
20  
21  
22  
23  
24  
25  
26  
27  
28  
29  
30  
31  
32  
33  
34  
35  
36  
37  
38  
39  
40  
41  
42  
43  
44  
45  
46  
47  
48  
49  
50  
51  
52  
53  
54  
55  
56  
57  
58  
59  
60

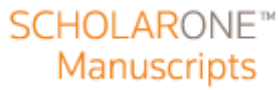

**TITLE PAGE****Title of the article**

Traumatic stress symptoms in family caregivers of patients with acute leukemia: protocol for a multisite mixed methods, longitudinal, observational study

**Full name, postal address and e-mail of the corresponding author**

Gary Rodin, 700 Bay Street, Toronto, ON, Canada M5G 1Z6

[Gary.Rodin@uhn.ca](mailto:Gary.Rodin@uhn.ca)

**Full name, department, institution, city and country of all co-authors**

Lindsay Jibb, Child Health Evaluative Sciences, Hospital for Sick Children, Toronto, Canada; Lawrence S Bloomberg Faculty of Nursing, University of Toronto, Toronto, Canada

Stephanie M. Nanos, Department of Supportive Care, Princess Margaret Cancer Centre, University Health Network, Toronto, Canada; Child Health Evaluative Sciences, Hospital for Sick Children, Toronto, Canada

Sarah Alexander, Division of Haematology/Oncology, Hospital for Sick Children, Toronto, Canada; Department of Pediatrics, University of Toronto, Toronto, Canada

Carmine Malfitano, Department of Supportive Care, Princess Margaret Cancer Centre, University Health Network, Toronto, Canada

Anne Rydall, Department of Supportive Care, Princess Margaret Cancer Centre, University Health Network, Toronto, Canada

Sumit Gupta, Division of Haematology/Oncology, Hospital for Sick Children, Toronto, Canada; Department of Pediatrics, University of Toronto, Toronto, Canada

Aaron D. Schimmer, Department of Medical Oncology/Hematology, Princess Margaret Cancer Centre, University Health Network, Toronto, Canada; Department of Medical Biophysics, University of Toronto, Toronto, Canada

Camilla Zimmermann, Department of Supportive Care, Princess Margaret Cancer Centre, University Health Network, Toronto, Canada; Department of Psychiatry, University of Toronto, Toronto, Canada

Sarah Hales, Department of Supportive Care, Princess Margaret Cancer Centre, University Health Network, Toronto, Canada; Department of Psychiatry, University of Toronto, Toronto, Canada

Rinat Nissim, Department of Supportive Care, Princess Margaret Cancer Centre, University Health Network, Toronto, Canada; Department of Psychiatry, University of Toronto, Toronto, Canada

Charles Marmar, Department of Psychiatry, New York University, New York, USA

Katharina Schultebras, Department of Emergency Medicine, Columbia University Irving Medical Centre, New York, USA; Department of Psychiatry, Columbia University, New York, USA

Kenneth Mah, Department of Supportive Care, Princess Margaret Cancer Centre, University Health Network, Toronto, Canada

Gary Rodin, Department of Supportive Care, Princess Margaret Cancer Centre, University Health Network, Toronto, Canada; Department of Psychiatry, University of Toronto, Toronto, Canada

**Word count:** 3,425

## ABSTRACT

**Introduction** The diagnosis, progression, or recurrence of cancer is often highly traumatic for family caregivers (FCs), but systematic assessments of distress and approaches for its prevention and treatment are lacking. Acute leukemia (AL) is a life-threatening cancer of the blood, which most often presents acutely, requires intensive treatment, and is associated with severe physical symptoms. Consequently, traumatic stress may be common in the FCs of patients with AL. We aim to determine the prevalence, severity, longitudinal course, and predictors of traumatic stress symptoms in FCs of patients with AL in the first year after diagnosis, and to understand their lived experience of traumatic stress and perceived support needs.

**Methods and analysis** This two-site longitudinal, observational, mixed methods study will recruit 223 adult FCs of pediatric or adult patients newly diagnosed with AL from 2 tertiary care centres. Quantitative data will be collected from self-report questionnaires at enrolment, and 1, 3, 6, 9 and 12-months after admission to hospital for initial treatment. Quantitative data will be analyzed using descriptive and machine learning approaches and a multi-level modelling approach will be used to confirm machine learning findings. Semi-structured qualitative interviews will be conducted at 3, 6, and 12-months and analyzed using a grounded theory approach.

**Ethics and dissemination** This study is funded by the Canadian Institutes of Health Research (CIHR #PJT 173255) and has received ethical approval from the Ontario Research Ethics Board (CTO Project ID: 2104). The data generated have the potential to inform the development of targeted psychosocial interventions for traumatic stress, which is a public health priority for high-risk populations such as FCs of patients with hematological malignancies. An integrated and end-of-study knowledge translation strategy that involves FCs and other stakeholders will be used to interpret and disseminate study results.

**Keywords** cancer; hematological malignancies; acute leukemia; supportive care; psychosocial intervention; traumatic stress; caregivers

## ARTICLE SUMMARY

### Strengths and limitations of this study

- This study will examine the longitudinal course and predictors of traumatic stress symptoms of family caregivers of patients diagnosed with acute leukemia at key timepoints in their disease and treatment trajectory.
- Qualitative interviews analyzed using a grounded theory approach will preserve the complexity and context of the caregiver experience and will integrate with the quantitative data to deepen our understanding of their traumatic stress symptoms.
- The inclusion of a diverse group of family caregivers with variance in characteristics such as age, sex, gender, race, ethnicity, attachment style, relationship to patient, and type of leukemia provides an opportunity to understand the impact of caregiver factors on traumatic stress symptoms.
- The generalizability of our findings may be limited by caregiver enrolment from cancer care centres in a single metropolitan area and the potential for selection bias.

## INTRODUCTION

Acute leukemia (AL) is a life-threatening hematological malignancy characterized by rapid onset, the requirement for immediate hospitalization to initiate care, and intensive and prolonged medical treatment. The primary types of AL are acute lymphoblastic leukemia (ALL) and acute myeloid leukemia (AML). Both occur in patients of all ages, but the epidemiology, disease features, and outcomes vary with age and disease type. Treatment of AL is associated with the risk of serious and potentially fatal side effects including bleeding, infection, mucositis, nausea and vomiting, pain, and multiple other drug-specific side effects.[1-3] There is now robust evidence showing that the diagnosis of AL in patients from infants to older adults is a singularly stressful event, followed by a period of intense and difficult life choices and experiences.[4-9] Those who are cured of AL may still endure long-term treatment sequelae including neurocognitive deficits, infertility, endocrine, musculoskeletal and cardiac impairments, and risk of secondary cancers.[6,10-14]

### **The impact of AL on family caregivers**

The diagnosis of AL and its treatment impose a substantial burden on family caregivers (FCs), who may be partners, adult children, or parents.[7-9] FCs of patients with cancer are increasingly expected to assume lead roles in complex clinical tasks, such as coordination of care, symptom management, medication administration, and direct patient care, while maintaining other ongoing responsibilities, such as employment and care for other dependents.[15-23] These multiple roles, coupled with financial strain due to the cost of non-reimbursed medical care, travel, other family caregiving and home responsibilities, and the loss of employment income, are major sources of distress for FCs.[16,24,25] This burden of caring,[24] which falls disproportionately on women, [26] and the constant threat that a partner, parent, or child will suffer or die, constitute substantial threats to the mental and physical health of FCs.[27-29]

### **Traumatic stress symptoms**

The immediate psychological response to the diagnosis of a life-threatening cancer of both patients and FCs is often traumatic stress (TS) symptoms.[4,5,28,30] These symptoms include hyperarousal (e.g., hypervigilance, decreased concentration, heightened startle response, insomnia, irritability), intrusive thoughts (e.g., nightmares, flashbacks, altered sense of reality), emotional detachment or numbing, and depression.[31,32] Symptoms of TS occurring within one month of the traumatic event may meet the Diagnostic and Statistical Manual of Mental Disorders (DSM) criteria for acute stress disorder (ASD) and those that persist for longer than a month may meet diagnostic criteria for post-traumatic stress disorder (PTSD).[31] Risk factors for ASD and PTSD following a traumatic event include younger age, female sex, feminine gender role, and direct or vicarious exposure to traumatic events, including in first responders to trauma victims.[33-35] Gender is not only a risk factor for PTSD in its own right but is also a proxy for multiple interacting social, economic, and political influences on distress.[36] As a whole, traumatic stress disorders are highly disturbing to those affected and are associated with a subsequent ten-fold increase in the risk of completed suicide[37] and an increased risk of cardiovascular, metabolic, and musculoskeletal disorders[38] and all-cause mortality.[39]

### **The social context of traumatic stress symptoms**

The social environment in which individuals exposed to trauma are situated has been shown to directly affect the severity and nature of TS symptoms.[36] In that regard, the inverse relationship between symptoms of PTSD and social support, including that received from healthcare

professionals (HCPs), is one of the most consistent relationships observed in trauma research.[40-42] Internalized representations of support and the capacity to make use of it, reflected in the construct of attachment security,[43] have also been shown to protect from the development of PTSD following exposure to trauma.[44] Measured on dimensions of attachment anxiety and attachment avoidance,[45,46] attachment security has been shown to play a critical role in the management of terror, specifically that related to death anxiety.[47]

### **Traumatic stress symptoms in family caregivers**

Clinically significant TS symptoms are common in FCs of patients with metastatic cancer, with similar rates in partners and parents of patients.[28,48] Risk factors that have been identified for the development of TS in FCs of patients include: (i) FC variables such as female sex,[49] identification with traditionally feminine gender roles,[28,50] younger age,[27] less social support and less attachment security,[51] lower family income,[29] and higher perceived burden of caregiving tasks;[52,53] (ii) patient variables such as younger age[54] and greater disease severity;[55] and (iii) the nature of the caregiver-patient relationship,[56] with close familial relationships being associated with greater TS.[57,58]

Research has demonstrated the psychological impact of metastatic cancer on patients[59,60] and their FCs.[58] Several studies have highlighted the psychological impact of hematological malignancies on patients.[4,5,61] However, there has been little research attention to the psychological consequences of hematological malignancies on FCs, and systematic approaches to prevent and alleviate distress in this high-risk population have not been developed. The acute onset of AL, the intensive and prolonged treatment, the substantial burden of caregiving, and the uncertainty regarding clinical outcomes suggest that TS symptoms may be common in FCs. However, the prevalence, severity, and predictors of TS over time, and the experience of FCs of patients with AL across the life course have not been determined.

### **Study objectives**

The objectives of the present study are to determine in FCs of patients with AL:

1. The prevalence, severity, longitudinal course, and predictors of TS symptoms over the first year following a new diagnosis of AL;
2. The FC experience of TS, including the impact of AL on their lives and that of their families, the nature of their distress, their relationship with HCPs, and their perceived resources and met and unmet support needs.

The findings from this study will provide essential information to inform research, clinical practice, and health policy regarding the comprehensive and family-centred treatment of AL.

## **METHODS AND ANALYSIS**

### **Patient and public involvement**

This study will be conducted with the early and ongoing engagement of FCs and other stakeholders. Specifically, our FC- and HCP-collaborators have informed the construction of this study, including the mixed methods approach and relevant sampling timepoints, will be closely involved in the interpretation and dissemination of the data, and will lead in advocacy efforts to support

1  
2  
3 policy change related to the care of FCs. The patient and family advisory councils at our study  
4 sites will also be engaged to support study conduct from implementation to dissemination.  
5

### 6 7 **Study design and setting**

8 This is a prospective, observational study using mixed quantitative and qualitative methodology.  
9 FCs will be recruited from the Princess Margaret Cancer Centre, part of the University Health  
10 Network, and the Hospital for Sick Children, in Toronto, Canada.  
11

### 12 13 **Eligibility criteria**

14 FCs will be: (i) the self-identified primary or co-primary caregiver (i.e., person assuming at least  
15 40% of patient care activities) of a pediatric or adult patient newly diagnosed with primary AL  
16 (AML or ALL) within three months of admission to either of our study sites; (ii)  $\geq 18$  years old;  
17 and (iii) fluent in English.  
18

### 19 20 **Ineligibility criteria**

21 FCs of patients with acute promyelocytic leukemia (APML) or who do not receive induction  
22 chemotherapy with curative intent will be ineligible.  
23

### 24 25 **Data collection**

26 FC recruitment will occur over 36 months and is expected to be completed in 2024. Following  
27 informed consent, participating FCs will complete a demographics questionnaire and the disease-  
28 related characteristics of the associated patient will be abstracted from the patient's medical chart  
29 (Table 1). FCs will then complete a baseline outcome questionnaire package on REDCap (i.e., a  
30 secure online browser-based application for building and managing online surveys and research  
31 databases), and follow-up online outcome questionnaire packages at 1, 3, 6, 9 and 12-months after  
32 the patient's admission to the hospital for a new diagnosis of AL (Table 1). Questionnaire package  
33 completion time is expected to be 20-30 minutes at each assessment point. A subgroup of FCs will  
34 be invited to participate in audio- and/or video-recorded, semi-structured, qualitative interviews at  
35 3, 6, and 12-months. Interviewees may participate in interviews at more than one sampling  
36 timepoint. Sampling for interviews will be purposeful in an attempt to achieve maximum variation  
37 in FC characteristics including age, sex, gender, gender role, FC-patient relationship, scores on  
38 quantitative measures, race, ethnicity, and patient's AL type. The interviews will be conducted by  
39 a trained interviewer and will focus on the FC experience of caring for someone with AL, the  
40 impact of caring on the lives of FCs and that of their families, FC met and unmet support needs,  
41 and the FC experience with the patient's treatment and HCPs (Table 2). Interviews are expected  
42 to last between 30-60 minutes.  
43  
44  
45  
46  
47  
48  
49  
50  
51  
52  
53  
54  
55  
56  
57  
58  
59  
60

**Table 1. Timeline of study activities**

|                                                    | <b>Enrollment<br/>Baseline</b> | <b>1-Month<br/>Follow-up<br/>Baseline*</b> | <b>3-Months<br/>Follow-up<br/>Baseline*</b> | <b>6-Months<br/>Follow-up</b> | <b>9-Months<br/>Follow-up</b> | <b>12-Months<br/>Follow-up</b> |
|----------------------------------------------------|--------------------------------|--------------------------------------------|---------------------------------------------|-------------------------------|-------------------------------|--------------------------------|
| <b>Recruitment</b>                                 |                                |                                            |                                             |                               |                               |                                |
| <b>Confirm Eligibility</b>                         | ✓                              | *                                          | *                                           |                               |                               |                                |
| <b>Initial Approach</b>                            | ✓                              | *                                          | *                                           |                               |                               |                                |
| <b>Caregiver Quantitative<br/>Informed Consent</b> | ✓                              | *                                          | *                                           |                               |                               |                                |
| <b>Caregiver Qualitative<br/>Informed Consent</b>  |                                |                                            | ✓                                           |                               |                               |                                |
| <b>Patient Informed<br/>Consent/Assent**</b>       | ✓                              | *                                          | *                                           |                               |                               |                                |
| <b>Quantitative Data Collection</b>                |                                |                                            |                                             |                               |                               |                                |
| <b>Demographics</b>                                | ✓                              | *                                          | *                                           |                               |                               |                                |
| <b>PCL-5</b>                                       | ✓                              | ✓                                          | ✓                                           | ✓                             | ✓                             | ✓                              |
| <b>SASRQ</b>                                       | ✓                              | ✓                                          | ✓                                           | ✓                             | ✓                             | ✓                              |
| <b>ECR-M16</b>                                     | ✓                              | ✓                                          | ✓                                           | ✓                             | ✓                             | ✓                              |
| <b>PHQ-9</b>                                       | ✓                              | ✓                                          | ✓                                           | ✓                             | ✓                             | ✓                              |
| <b>CRA</b>                                         | ✓                              | ✓                                          | ✓                                           | ✓                             | ✓                             | ✓                              |
| <b>ESSI</b>                                        | ✓                              | ✓                                          | ✓                                           | ✓                             | ✓                             | ✓                              |
| <b>FAMCARE</b>                                     | ✓                              | ✓                                          | ✓                                           | ✓                             | ✓                             | ✓                              |
| <b>TMF</b>                                         | ✓                              | *                                          | *                                           |                               |                               |                                |
| <b>Qualitative Data Collection</b>                 |                                |                                            |                                             |                               |                               |                                |
| <b>Interview</b>                                   |                                |                                            | ✓                                           | ✓                             |                               | ✓                              |
| <b>Patient Chart Data Collection</b>               |                                |                                            |                                             |                               |                               |                                |
| <b>Medical Abstraction</b>                         | ✓                              | ✓                                          | ✓                                           | ✓                             | ✓                             | ✓                              |

*Table 1 Footnotes:*

\*FCs recruited two weeks to three months after admission to the hospital will complete a baseline questionnaire package at either the 1-month or 3-month timepoint. Follow-up questionnaire packages will be completed at subsequent timepoints.

\*\*Adult patients with AL ( $\geq 18$  years of age) and pediatric patients with AL will be asked to provide their informed consent and/or assent, respectively, to allow medical chart information regarding their disease and its treatment to



be extracted and documented over the course of this study. The determination of whether consent or assent is necessary for the pediatric patients will be based on a capacity assessment by a regulated healthcare professional from the research or clinical team.

Abbreviations: PCL-5 = PTSD Checklist for DSM-5; PTSD = Post-Traumatic Stress Disorder; DSM-5 = Diagnostic and Statistical Manual of Mental Disorders, Fifth Edition; SASRQ = Stanford Acute Stress Reaction Questionnaire; ECR-M16 = modified and brief Experiences in Close Relationships scale; PHQ-9 = Patient Health Questionnaire-9; CRA = Caregiver Reaction Assessment scale; ESSI = ENRICHD Social Support Instrument; FAMCARE = Family Satisfaction with End-of-Life Care scale; TMF = Traditional Masculinity-Femininity scale.

**Table 2. Example questions from the semi-structured qualitative interview guide**

### Impact of the Disease

Can you describe what it was like for you when you first heard about [patient's] diagnosis of leukemia?  
How, if at all, have things changed for you since [patient's] diagnosis of leukemia?

### Experience of Support

How supported have you felt?  
What types of support have you received?

### Experience of Care

What is your experience with the care [patient] has received from the hospital?  
Can you describe your relationship with the medical team?

## Outcome measures

### Primary outcome

(i) **Traumatic stress symptoms**, will be measured with the 30-item Stanford Acute Stress Reaction Questionnaire (SASRQ)[62,63] updated to be DSM-5-concordant[31] for ASD symptoms. This scale is one of the most widely used scales for measuring TS symptoms and has demonstrated test-retest reliability,[62,63] and predictive, construct, discriminant, and convergent validity across diverse samples.[62-66] The DSM-5-concordant version of the SASRQ has not yet been validated. Therefore, the 20-item PTSD Checklist for DSM-5 (PCL-5) will also be administered.[67] The PCL-5 is widely used to assess TS symptoms and the revised DSM-5 version has demonstrated good psychometric properties.[68-70]

### Predictors

(i) **Attachment security**, will be measured with the modified and brief Experiences in Close Relationships (ECR-M16) scale.[46] The ECR-M16 is a widely used, reliable, and valid 16-item measure of attachment security with subscales assessing anxious and avoidant attachment.

(ii) **Depressive symptoms**, will be measured with the Patient Health Questionnaire-9 (PHQ-9).[71] The PHQ-9 is a reliable and valid 9-item measure routinely administered to screen for depressive symptoms in cancer. Two additional items assessing suicidal intent and interference with life have been added.[72,73]

(iii) **Caregiver burden**, will be measured with the Caregiver Reaction Assessment (CRA) scale.[74] The CRA is a reliable and valid 24-item scale assessing positive and negative reactions to five domains of caregiver burden: disrupted schedule, financial problems, lack of family support, health problems, and the impact on self-esteem.

(iv) **Perceived social support**, will be measured with the ENRICH Social Support Instrument (ESSI).[75] The ESSI is a 7-item scale assessing the perceived availability of social support. This measure has been used in AL and has shown good reliability and validity.[76,77]

(v) **FC satisfaction with care**, will be measured with the Family Satisfaction with End-of-Life Care (FAMCARE) scale.[78] The FAMCARE is a reliable and valid 20-item scale measuring satisfaction with the behaviour of HCPs towards FCs and the patients they care for diagnosed with advanced cancer.

(v) **Gender role**, will be measured (*at baseline only*) with the Traditional Masculinity-Femininity (TMF) scale.[79] The TMF is a 6-item scale that assesses the degree to which people view their interests, selves, behaviour, and other aspects as masculine or feminine. It has been validated in multiple cultural and age-group contexts.[80]

### Sample size

#### Quantitative

Our sample size calculation for determining TS prevalence in FCs is based on the following established formula[81] to estimate sample sizes for descriptive studies:

$$n = \frac{Z^2 P(1 - P)}{d^2}$$

where  $n$  = sample size,  $Z$  =  $Z$  statistic for confidence level,  $P$  = expected prevalence, and  $d$  = level of precision. Based on previous prevalence estimates of TS in our adult sample of patients with AL (i.e., 14% meeting criteria for ASD as measured with the SASRQ)[4] and the 11.8% PTSD prevalence in FCs of solid tumor patients,[48] we have conservatively set our expected prevalence to .14,  $Z$  to 1.96, and  $d$  to .05 (an appropriate precision for the expected prevalence[81]). The necessary sample size is 185. Our anticipated attrition rate is 15% based on previous longitudinal research at our study sites.[5,82] To compensate for attrition, the enrollment of at least 213 FCs is required to achieve our objective of determining TS prevalence in FCs. Based on expected new AL cases at both sites we can feasibly recruit 223 within our 36-month recruitment period and will therefore aim for this target.

We will also use multi-level modelling (MLM) as a non-machine learning (ML) benchmark model to determine potential TS predictors and have therefore calculated a power estimate for  $N=185$  using GLIMMPSE version 3 online software,[83,84] which performs power and sample size calculations for multilevel designs. We derived power estimates for the following parameters, with the SASRQ total score as the outcome: a design with eight groups (i.e., to reflect crossing of caregiver gender [categorical predictor; female/male], patient age [continuous predictor; younger/older], and attachment security [continuous predictor; lower/higher] as the possible main three MLM predictors of interest) and six timepoints; decreasing intercorrelation across repeated measures, from .60 to .52; and mean and SD scaling factors of 1 and 1.5, to account for uncertainty about observed means and SDs. Power estimates were calculated for each two-way predictor x time interaction as the main hypothesis tested. Entered mean and SD estimates for the SASRQ were based on estimates from a recent phase II longitudinal clinical trial of a psychological-palliative care intervention for patients with acute leukemia.[1] The ranges of computed power estimates for a calculated sample size of 184 are: for caregiver gender x time, .34–.89 (power

1  
2  
3 estimate for means and SDs without scaling=.51); for attachment security x time, .81–1.00 (power  
4 estimate without scaling=.95); and for patient age x time, .85–1.00 (power without scaling=.97).  
5

### 6 7 Qualitative

8 Our interview sample size will be determined by data saturation. Based on our previous qualitative  
9 work and our heterogenous sample, we estimate that a purposeful subgroup of 30 FCs will  
10 participate in interviews at the 3, 6, and 12-month timepoints.[85-88]  
11

### 12 Analysis

#### 13 Quantitative

14 All quantitative analyses will be conducted with R software and alpha will be set to .05.[89]  
15 Descriptive statistics will be used for FC sociodemographic and patient medical characteristics.  
16 We will descriptively characterize the prevalence and severity (with variability) of TS symptoms.  
17  
18

19 A broad range of candidate predictors of TS symptoms have been identified.[90] However, the  
20 heterogeneity of risk factors, the clinical appearance, and etiology of TS hampers the analysis of  
21 risk factors using traditional regression models.[91] The high dimensionality and likely  
22 multicollinearity among predictors and interaction of predictors pose challenges for statistical  
23 models and require the application of advanced computational approaches.[92] Studies using  
24 advanced ML have been developed to examine predictors of psychiatric risk such as PTSD risk  
25 and to facilitate the implementation of precision psychiatry into clinical practice.[93-98] We will  
26 use a supervised ML approach that is based on well-established methodologies in clinical  
27 prediction modelling including data pre-processing, such as handling of missing values, guarding  
28 against “overfitting”, and rigorous model evaluation in terms of established metrics for  
29 discrimination and calibration.[99-104] Confidence intervals for all point estimates will be  
30 calculated to communicate uncertainty of the model. Moreover, to assess the generalization ability  
31 of the model on data not used to develop the model, we will partition the data to perform a held-  
32 out validation test.[104,105]  
33  
34  
35

36 We will use latent growth mixture modelling (LGMM) to identify heterogeneous longitudinal  
37 trajectories of TS response.[106] Individuals will be assigned to trajectories based on their most  
38 likely class membership. The best-fitting model will be selected based on the Information Criteria  
39 [Akaike Information Criteria (AIC), Bayesian Information Criteria (BIC), and Sample Size  
40 Adjusted Bayesian Information Criteria (SSBIC)], along with fit statistics (such as the Bootstrap  
41 Log Likelihood Test), as well as parsimony and interpretability consistent with recommendations  
42 from the literature.[107,108] We will test diverse predictive models for robustness in predicting  
43 LGMM trajectories, including random forest (RF) and support vector machines (SVM). As the  
44 final model, we will select the simplest model within one standard error of the best model to allow  
45 for a more parsimonious model. We will benchmark our predictive model with computational  
46 simpler models (including MLM). Predictors included in our models will be FC age, sex, gender,  
47 gender role, family income, baseline attachment security, perceived social support, caregiver  
48 burden, and satisfaction with provided care, relationship to patient, and patient age and treatment  
49 response. We will use Explainable Machine Learning using SHAP (SHapley Additive  
50 exPlanation)[109] to identify those features that are mainly responsible for driving the individual  
51 outcome prediction. It is an additive feature attribution method that uses kernel functions and a  
52  
53  
54  
55  
56  
57  
58  
59

well-established method to interpret ML models.[109] We will also use SHAP dependence plots to examine potential interactions among the three most important predictors in the ML model.

We will confirm our predictor-related findings using MLM, which permits cases with missing data to be included in longitudinal modeling. In this case, we will use the three most important predictors to prevent “overfitting”, identified in the ML approach to test for direct linear relationships. The main effects of each of these predictors, their individual interactions with Time, and their random effects will be examined. Sociodemographic and medical covariates, including disease type (ALL vs. AML) and depressive symptoms, will be entered to control for their effects.

### Qualitative

All interview audio-recordings will be transcribed verbatim by a trained transcriptionist, verified for accuracy, de-identified to protect privacy, and imported, along with field notes, into NVivo software[110] for data management and analysis. Consistent with a constant comparative method, data analyses will begin once the first interview has been transcribed, allowing data from early interviews to inform later interviews.[111] Data will be independently coded in duplicate using a line-by-line approach by trained qualitative analysts using a coding tree developed using the team’s expertise and the TS scientific literature. Using content analysis, codes will be grouped into categories based on between-code relationships and categories will then be grouped into themes according to the predictors and longitudinal course of TS symptoms.[112,113] Categories and themes will then be compared across FC traits to understand similarities and differences in experiences depending on these characteristics. Quantitative data will be integrated into the analysis process to illustrate or clarify qualitative results related to the FC experience using a mixed methods matrix approach.[114] Any discrepancies in opinion regarding coding will be resolved using arbitration with our study team and such meetings will occur regularly at data analysis review meetings. An audit trail consisting of a detailed chronology of data collection and analytical decisions will be kept to enhance validity.[115]

## ETHICS AND DISSEMINATION

### Ethics

The study received provincial approval from the Ontario Research Ethics Board (CTO Project ID: 2104) on July 22, 2021, and centre approval for both sites in October, 2021. Institutional Authorization was provided by both sites in November, 2021.

### Dissemination

We have designed an evidence-based dissemination strategy aimed at increasing awareness and knowledge of the psychological risks to FCs of patients with AL,[116] as well as FC- and patient-level factors associated with these risks, to inform scientific investigation in the field and change point-of-care practice. Our dissemination strategy will include the presentation of results at major psychosocial and medical oncology conferences, publications in leading medical or oncology journals, and postings on key websites such as the Global Institute of Psychosocial, Palliative and End-of-Life Care (GIPPEC; [www.gippec.org](http://www.gippec.org)) based at the Princess Margaret Cancer Centre and the University of Toronto, affiliated hospitals and universities, and via our collaborative partnerships with local, national, and international oncology groups. The following materials will also be developed and disseminated: (i) a 1-page brochure for oncology HCPs at adult and pediatric centres; (ii) a 3-minute YouTube video; (iii) media releases; and (iv) fact sheets to support patients

1  
2  
3 and FCs across Canada to advocate for policy change, if warranted. Furthermore, specific  
4 implications pertaining to FC subgroups (e.g., those differing across sex, gender, ethnicity,  
5 caregiver role, etc.) will be highlighted in manuscripts and other knowledge translation efforts to  
6 bolster impacts across the diversity of FCs.  
7

### 8 9 **Conclusion**

10 The present mixed methods, longitudinal study of the psychological impact on FCs of individuals  
11 diagnosed with AL across the life cycle is the first of its kind and will provide a comprehensive  
12 understanding of the FC lived experience and subjective distress, as well as associated supportive  
13 care needs. The quantitative and qualitative results will inform the development of a tailored  
14 psychosocial intervention to prevent or alleviate TS in this high-risk population and have the  
15 potential to be applied to other life-threatening medical conditions.  
16  
17

### 18 **Acknowledgements**

19 The authors thank research coordinators Elham Hashemi at the Hospital for Sick Children, and  
20 Kyle Fitzgibbon at the Princess Margaret Cancer Centre, for their continued support of this  
21 project.  
22  
23

### 24 **Authors' contributions**

25 All authors in this manuscript have contributed to the conception, design, acquisition, analysis or  
26 interpretation of data. GR, LJ, SA, AR, and CM conceptualised the project. SG, ADS, CZ, SH,  
27 RN, and CM contributed to design, as did KS and KM, who conceived the sample size calculations  
28 and statistical analysis. SN revised the protocol, and is responsible for data collection, analysis,  
29 interpretation. GR, LJ, AR, SH, RN, KS and KM will also analyse and interpret the data. All  
30 authors read and provided final approval for this manuscript to be published. The authors  
31 understand their role in taking responsibility and being accountable for what is published. They  
32 are committed to transparency and have disclosed all relationships, activities and interests related  
33 to the content of this manuscript.  
34  
35

36 **Funding statement** This work was supported by a project grant from the Canadian Institutes of  
37 Health Research (CIHR) grant number PJT 173255.  
38  
39

40 **Competing interests** ADS has received research funding from Takeda Pharmaceuticals, BMS and  
41 Medivir AB, and consulting fees/honorarium from Takeda, Novartis, Jazz, and Otsuka  
42 Pharmaceuticals. ADS is named on a patent application for the use of DNT cells to treat AML.  
43  
44  
45  
46  
47  
48  
49  
50  
51  
52  
53  
54  
55  
56  
57  
58  
59  
60



## REFERENCES

1. Rodin G, Malfitano C, Rydall A, et al. Emotion and Symptom-focused Engagement (EASE): a randomized phase II trial of an integrated psychological and palliative care intervention for patients with acute leukemia. *Support Care Cancer* 2020;28(1):163-76. doi:10.1007/s00520-019-04723-2 [published Online First: 17 April 2019].
2. Zimmermann C, Yuen D, Mischitelle A, et al. Symptom burden and supportive care in patients with acute leukemia. *Leuk Res* 2013;37(7):731-6. doi: 10.1016/j.leukres.2013.02.009 [published Online First: 11 March 2013]
3. Shaulov A, Rodin G, Popovic G, et al. Pain in patients with newly diagnosed or relapsed acute leukemia. *Supp Care Cancer* 2019;27(8):2789-97. doi: 10.1007/s00520-018-4583-5 [published Online First: 8 December 2018]
4. Rodin G, Yuen D, Mischitelle A, et al. Traumatic stress in acute leukemia. *Psychooncology* 2013;22(2):299-307. doi:10.1002/pon.2092 [published Online First: 13 November 2011]
5. Rodin G, Deckert A, Tong E, et al. Traumatic stress in patients with acute leukemia: a prospective cohort study. *Psychooncology* 2018;27(2):515-23. doi:10.1002/pon.4488 [published Online First: 10 August 2017].
6. Baker KS, Ness KK, Weisdorf D, et al. Late effects in survivors of acute leukemia treated with hematopoietic cell transplantation: a report from the Bone Marrow Transplant Survivor Study. *Leukemia* 2010;24(12):2039-47. doi:10.1038/leu.2010.210 [published Online First: 23 September 2010].
7. Kazak AE, Hwang W-T, Chen FF, et al. Screening for family psychosocial risk in pediatric cancer: validation of the Psychosocial Assessment Tool (PAT) Version 3. *J Pediatr Psychol* 2018;43(7):737-48. doi:10.1093/jpepsy/jsy012
8. Richardson AE, Morton RP, Broadbent EA. Illness perceptions and coping predict post-traumatic stress in caregivers of patients with head and neck cancer. *Support Care Cancer* 2016;24(10):4443-50. doi:10.1007/s00520-016-3285-0 [published Online First: 30 May 2016].
9. Wadhwa D, Burman D, Swami N, et al. Quality of life and mental health in caregivers of outpatients with advanced cancer. *Psychooncology* 2013;22(2):403-10. doi:10.1002/pon.2104 [published Online First: 2 December 2011].
10. Gibson TM, Mostoufi-Moab S, Stratton KL, et al. Temporal patterns in the risk of chronic health conditions in survivors of childhood cancer diagnosed 1970–99: a report from the Childhood Cancer Survivor Study cohort. *Lancet Oncol* 2018;19(12):1590-1601. doi:10.1016/S1470-2045(18)30537-0 [published Online First: 8 November 2018].
11. Mulrooney DA, Hyun G, Ness KK, et al. The changing burden of long-term health outcomes in survivors of childhood acute lymphoblastic leukaemia: a retrospective analysis of the St Jude Lifetime Cohort Study. *Lancet Haematol* 2019;6(6):e306-e316. doi:10.1016/S2352-3026(19)30050-X [published Online First: 8 May 2019].
12. Timilshina N, Breunis H, Tomlinson GA, et al. Long-term recovery of quality of life and physical function over three years in adult survivors of acute myeloid leukemia after intensive chemotherapy. *Leukemia* 2019;33(1):15-25. doi:10.1038/s41375-018-0162-5 [published Online First: 8 June 2018].
13. Leung W, Hudson MM, Strickland DK, et al. Late effects of treatment in survivors of childhood acute myeloid leukemia. *J Clin Oncol* 2000;18(18):3273-9. doi:10.1200/JCO.2000.18.18.3273

14. van der Does-van den Berg A, de Vaan GA, van Weerden JF, et al. Late effects among long-term survivors of childhood acute leukemia in The Netherlands: a Dutch Childhood Leukemia Study Group Report. *Pediatr Res* 1995;38(5):802-7. doi:10.1203/00006450-199511000-00027
15. Geng HM, Chuang DM, Yang F, et al. Prevalence and determinants of depression in caregivers of cancer patients: a systematic review and meta-analysis. *Medicine (Baltimore)* 2018;97(39):e11863. doi:10.1097/MD.00000000000011863
16. Mohammed S, Swami N, Pope A, et al. "I didn't want to be in charge and yet I was": bereaved caregivers' accounts of providing home care for family members with advanced cancer. *Psychooncology* 2018;27(4):1229-36. doi:10.1002/pon.4657 [published Online First: 1 March 2018]
17. Burge F, Lawson B, Johnston G. Trends in the place of death of cancer patients, 1992-1997. *CMAJ* 2003;168(3):265-70. PMID: 12566330
18. Boyle D, Blodgett L, Gnesdiloff S, et al. Caregiver quality of life after autologous bone marrow transplantation. *Cancer Nurs* 2000;23(3):193-203; quiz 204-5. doi:10.1097/00002820-200006000-00006
19. Cain R, MacLean M, Sellick S. Giving support and getting help: informal caregivers' experiences with palliative care services. *Palliat Support Care* 2004;2(3):265-72. doi:10.1017/s1478951504040350
20. Glajchen M. The emerging role and needs of family caregivers in cancer care. *J Support Oncol* 2004;2(2):145-55. PMID: 15328817
21. Manne S. Cancer in the marital context: a review of the literature. *Cancer Invest* 1998;16(3):188-202. doi:10.3109/07357909809050036
22. Nijboer C, Tempelaar R, Sanderman R, et al. Cancer and caregiving: the impact on the caregiver's health. *Psychooncology* 1998;7(1):3-13. doi:10.1002/(SICI)1099-1611(199801/02)7:1<3::AID-PON320>3.0.CO;2-5
23. Pitceathly C, Maguire P. The psychological impact of cancer on patients' partners and other key relatives: a review. *Eur J Cancer* 2003;39(11):1517-24. doi:10.1016/s0959-8049(03)00309-5
24. Halpern MT, Fiero MH, Bell ML. Impact of caregiver activities and social supports on multidimensional caregiver burden: analyses from nationally-representative surveys of cancer patients and their caregivers. *Qual Life Res* 2017;26(6):1587-95. doi:10.1007/s11136-017-1505-9 [published Online First: 16 February 2017]
25. Williams AM, Wang L, Kitchen P. Differential impacts of care-giving across three caregiver groups in Canada: end-of-life care, long-term care and short-term care. *Health Soc Care Community* 2014;22(2):187-96. doi:10.1111/hsc.12075 [published Online First: 31 October 2013]
26. Schrank B, Ebert-Vogel A, Amering M, et al. Gender differences in caregiver burden and its determinants in family members of terminally ill cancer patients. *Psychooncology* 2016;25(7):808-14. doi:10.1002/pon.4005 [published Online First: 18 October 2015]
27. Shaffer KM, Jacobs JM, Nipp RD, et al. Mental and physical health correlates among family caregivers of patients with newly-diagnosed incurable cancer: a hierarchical linear regression analysis. *Support Care Cancer* 2017;25(3):965-71. doi:10.1007/s00520-016-3488-4 [published Online First: 19 November 2016]
28. van Warmerdam J, Zabih V, Kurdyak P, et al. Prevalence of anxiety, depression, and posttraumatic stress disorder in parents of children with cancer: a meta-analysis. *Pediatr*



- 1  
2  
3 *Blood Cancer* 2019;66(6):e27677. doi:10.1002/pbc.27677 [published Online First: 28  
4 February 2019]
- 5 29. van Warmerdam J, Sutradhar R, Kurdyak P, et al. Long-term mental health outcomes in  
6 mothers and siblings of children with cancer: a population-based, matched cohort study. *J*  
7 *Clin Oncol* 2020;38(1):51-62. doi:10.1200/JCO.19.01382 [published Online First: 12  
8 November 2019]
- 9 30. Liang J, Lee SJ, Storer BE, et al. Rates and risk factors for post-traumatic stress disorder  
10 symptomatology among adult hematopoietic cell transplant recipients and their informal  
11 caregivers. *Biol Blood Marrow Transplant* 2019;25(1):145-50.  
12 doi:10.1016/j.bbmt.2018.08.002 [published Online First: 9 August 2018]
- 13 31. American Psychiatric Association. Diagnostic and Statistical Manual of Mental  
14 Disorders, Fifth Edition (DSM-5). Washington, DC: American Psychiatric Association  
15 Publishing 2013.
- 16 32. Spiegel D. Treatment of acute traumatic stress reactions. *J Trauma Dissociation*  
17 2005;6(2):101-8. doi:10.1300/J229v06n02\_09
- 18 33. Shalev A, Liberzon I, Marmar C. Post-traumatic stress disorder. *N Engl J Med*  
19 2017;376(25):2459-69. doi:10.1056/NEJMra1612499
- 20 34. Kessler RC, Sonnega A, Bromet E, et al. Posttraumatic stress disorder in the National  
21 Comorbidity Survey. *Arch Gen Psychiatry* 1995;52(12):1048-60.  
22 doi:10.1001/archpsyc.1995.03950240066012
- 23 35. Street AE, Dardis CM. Using a social construction of gender lens to understand gender  
24 differences in posttraumatic stress disorder. *Clin Psychol Rev* 2018;66:97-105.  
25 doi:10.1016/j.cpr.2018.03.001 [published Online First: 9 March 2018]
- 26 36. Kimerling R, Allen MC, Duncan LE. Chromosomes to social contexts: sex and gender  
27 differences in PTSD. *Curr Psychiatry Rep* 2018;20(12):114. doi:10.1007/s11920-018-  
28 0981-0
- 29 37. Gradus JL, Qin P, Lincoln AK, et al. Acute stress reaction and completed suicide. *Int J*  
30 *Epidemiol* 2010;39(6):1478-84. doi:10.1093/ije/dyq112 [published Online First: 12 July  
31 2010]
- 32 38. Ryder AL, Azcarate PM, Cohen BE. PTSD and physical health. *Curr Psychiatry Rep*  
33 2018;20(12):116. doi:10.1007/s11920-018-0977-9
- 34 39. Schlenger WE, Corry NH, Williams CS, et al. A prospective study of mortality and  
35 trauma-related risk factors among a nationally representative sample of Vietnam veterans.  
36 *Am J Epidemiol* 2015;182(12):980-90. doi:10.1093/aje/kwv217
- 37 40. Chen SC, Lai YH, Liao CT, et al. Unmet supportive care needs and characteristics of  
38 family caregivers of patients with oral cancer after surgery. *Psychooncology*  
39 2014;23(5):569-77. doi:10.1002/pon.3458 [published First Online: 8 January 2014]
- 40 41. Vogt D, Erbes CR, Polusny MA. Role of social context in posttraumatic stress disorder  
41 (PTSD). *Curr Opin Psychol* 2017;14:138-42. doi:10.1016/j.copsyc.2017.01.006
- 42 42. Watson P. PTSD as a public mental health priority. *Curr Psychiatry Rep* 2019;21(7):61.  
43 doi:10.1007/s11920-019-1032-1
- 44 43. Goldberg S. Attachment and Development. Part of: Texts in Developmental Psychology  
45 Series. New York, NY: Routledge 2000.
- 46 44. Mikulincer M, Shaver PR, Solomon Z. An attachment perspective on traumatic and  
47 posttraumatic reactions. In: Safir MP, Wallach HS, Rizzo AS, eds. *Future Directions in*  
48 *Post-Traumatic Stress Disorder*. New York, NY: Springer 2015:79-96.
- 49  
50  
51  
52  
53  
54  
55  
56  
57  
58  
59  
60

- 1
- 2
- 3
- 4 45. Zhang F, Labouvie-Vief G. Stability and fluctuation in adult attachment style over a 6-
- 5 year period. *Attach Hum Dev* 2004;6(4):419-37. doi:10.1080/1461673042000303127
- 6 46. Lo C, Walsh A, Mikulincer M, et al. Measuring attachment security in patients with
- 7 advanced cancer: psychometric properties of a modified and brief Experiences in Close
- 8 Relationships scale. *Psychooncology* 2009;18(5):490-9. doi:10.1002/pon.1417
- 9 47. Willis E, Mah K, Shapiro GK, et al. Testing terror management theory in advanced
- 10 cancer. *Death Stud* Published Online First: 27 December 2021;1-10.
- 11 doi:10.1080/07481187.2021.2019145
- 12 48. Moschopoulou E, Hutchison I, Bhui K, et al. Post-traumatic stress in head and neck
- 13 cancer survivors and their partners. *Support Care Cancer* 2018;26(9):3003-11.
- 14 doi:10.1007/s00520-018-4146-9 [published Online First: 15 March 2018]
- 15 49. Unseld M, Krammer K, Lubowitzki S, et al. Screening for post-traumatic stress disorders
- 16 in 1017 cancer patients and correlation with anxiety, depression, and distress.
- 17 *Psychooncology* 2019;28(12):2382-8. doi:10.1002/pon.5239 [published 3 November
- 18 2019]
- 19 50. Kim Y, Mitchell HR, Ting A. Application of psychological theories on the role of gender
- 20 in caregiving to psycho-oncology research. *Psychooncology* 2019;28(2):228-54.
- 21 doi:10.1002/pon.4953 [published Online First: 27 December 2018]
- 22 51. Segrin C, Badger TA, Sikorskii A, et al. A dyadic analysis of stress processes in Latinas
- 23 with breast cancer and their family caregivers. *Psychooncology* 2018;27(3):838-46.
- 24 doi:10.1002/pon.4580 [published Online First: 29 November 2017]
- 25 52. Burnette D, Duci V, Dhembo E. Psychological distress, social support, and quality of life
- 26 among cancer caregivers in Albania. *Psychooncology* 2017;26(6):779-86.
- 27 doi:10.1002/pon.4081 [published Online First: 26 January 2016]
- 28 53. Deniz H, Inci F. The burden of care and quality of life of caregivers of leukemia and
- 29 lymphoma patients following peripheric stem cell transplantation. *J Psychosoc Oncol*
- 30 2015;33(3):250-62. doi:10.1080/07347332.2015.1019660
- 31 54. Shahi V, Lapid MI, Kung S, et al. Do age and quality of life of patients with cancer
- 32 influence quality of life of the caregiver? *J Geriatr Oncol* 2014;5(3):331-6.
- 33 doi:10.1016/j.jgo.2014.03.003 [published Online First: 14 April 2014]
- 34 55. Juth V, Silver RC, Sender L. The shared experience of adolescent and young adult cancer
- 35 patients and their caregivers. *Psychooncology* 2015;24(12):1746-53.
- 36 doi:10.1002/pon.3785 [published Online First: 25 March 2015]
- 37 56. Alam S, Hannon B, Zimmermann C. Palliative care for family caregivers. *J Clin Oncol*
- 38 2020;38(9):926-36. doi:10.1200/JCO.19.00018 [published Online First: 5 February 2020]
- 39 57. Tang ST, Chang WC, Chen JS, et al. Course and predictors of depressive symptoms
- 40 among family caregivers of terminally ill cancer patients until their death.
- 41 *Psychooncology* 2013;22(6):1312-8. doi:10.1002/pon.3141 [published Online First: 27
- 42 July 2012]
- 43 58. Braun M, Mikulincer M, Rydall A, et al. Hidden morbidity in cancer: spouse caregivers.
- 44 *J Clin Oncol* 2007;25(30):4829-34. doi:10.1200/JCO.2006.10.0909
- 45 59. Lo C, Zimmermann C, Rydall A, et al. Longitudinal study of depressive symptoms in
- 46 patients with metastatic gastrointestinal and lung cancer. *J Clin Oncol* 2010;28(18):3084-
- 47 9. doi:10.1200/JCO.2009.26.9712 [published Online First: 17 May 2010]
- 48 60. Rodin G, Lo C, Mikulincer M, et al. Pathways to distress: the multiple determinants of
- 49 depression, hopelessness, and the desire for hastened death in metastatic cancer patients.
- 50
- 51
- 52
- 53
- 54
- 55
- 56
- 57
- 58
- 59
- 60

- 1  
2  
3  
4  
5  
6  
7  
8  
9  
10  
11  
12  
13  
14  
15  
16  
17  
18  
19  
20  
21  
22  
23  
24  
25  
26  
27  
28  
29  
30  
31  
32  
33  
34  
35  
36  
37  
38  
39  
40  
41  
42  
43  
44  
45  
46  
47  
48  
49  
50  
51  
52  
53  
54  
55  
56  
57  
58  
59  
60
- Soc Sci Med* 2009;68(3):562-9. doi:10.1016/j.socscimed.2008.10.037 [published Online First: 7 December 2008]
61. El-Jawahri A, Abel GA, Traeger L, et al. Quality of life and mood of older patients with acute myeloid leukemia (AML) receiving intensive and non-intensive chemotherapy. *Leukemia* 2019;33(10):2393-2402. doi:10.1038/s41375-019-0449-1 [published Online First: 28 March 2019]
62. Cardeña E, Koopman C, Classen C, et al. Review of the Stanford Acute Stress Reaction Questionnaire (SASRQ). In: Stamm BH, ed. *Measurement of Stress, Trauma and Adaptation*. Lutherville, MD: Sidran Press 1996:293–7.
63. Lötvall R, Palmberg A, Cardeña E. A 20-years+ Review of the Stanford Acute Stress Reaction Questionnaire (SASRQ): Psychometric Properties and Findings, *J Trauma Dissociation* 2022; 6(3). doi:10.1016/j.ejtd.2022.100269
64. Cardeña E, Koopman C, Classen C, et al. Psychometric properties of the Stanford Acute Stress Reaction Questionnaire (SASRQ): a valid and reliable measure of acute stress. *J Trauma Stress* 2000;13(4):719-34. doi:10.1023/A:1007822603186
65. Cardeña E, Spiegel D. Dissociative reactions to the San Francisco Bay Area earthquake of 1989. *Am J Psychiatry* 1993;150(3):474-8. doi:10.1176/ajp.150.3.474
66. Freinkel A, Koopman C, Spiegel D. Dissociative symptoms in media eyewitnesses of an execution. *Am J Psychiatry* 1994;151(9):1335-9. doi:10.1176/ajp.151.9.1335
67. Weathers FW, Litz BT, Keane TM, et al. The PTSD Checklist for DSM-5 (PCL-5). Scale available from the National Center for PTSD at [www.ptsd.va.gov](http://www.ptsd.va.gov); 2013. (accessed 7 March 2022).
68. Blevins CA, Weathers FW, Davis MT, et al. The Posttraumatic Stress Disorder Checklist for DSM-5 (PCL-5): development and initial psychometric evaluation. *J Trauma Stress* 2015;28(6):489-98. doi:10.1002/jts.22059 [published Online First: 25 November 2015].
69. Bovin MJ, Marx BP, Weathers FW, et al. Psychometric properties of the PTSD Checklist for Diagnostic and Statistical Manual of Mental Disorders–Fifth Edition (PCL-5) in veterans. *Psychol Assess* 2016;28(11):1379-91. doi:10.1037/pas0000254 [published Online First: 14 December 2015]
70. Wortmann JH, Jordan AH, Weathers FW, et al. Psychometric analysis of the PTSD Checklist-5 (PCL-5) among treatment-seeking military service members. *Psychol Assess* 2016;28(11):1392-1403. doi:10.1037/pas0000260 [published Online First: 11 January 2016]
71. Kroenke K, Spitzer RL, Williams JB. The PHQ-9: validity of a brief depression severity measure. *J Gen Intern Med* 2001;16(9):606-13. doi:10.1046/j.1525-1497.2001.016009606.x
72. Lo C, Hales S, Rydall A, et al. Managing Cancer and Living Meaningfully: study protocol for a randomized controlled trial. *Trials* 2015;16(1):391. doi:10.1186/s13063-015-0811-1
73. Rodin G, Lo C, Rydall A, et al. Managing Cancer and Living Meaningfully (CALM): a randomized controlled trial of a psychological intervention for patients with advanced cancer. *J Clin Oncol* 2018;36(23):2422-32. doi:10.1200/JCO.2017.77.1097 [published Online First: 29 June 2018]
74. Nijboer C, Triemstra M, Tempelaar R, et al. Measuring both negative and positive reactions to giving care to cancer patients: psychometric qualities of the Caregiver

- Reaction Assessment (CRA). *Soc Sci Med* 1999;48(9):1259-69. doi:10.1016/s0277-9536(98)00426-2
75. The ENRICHD Investigators (Berkman LF, Carney R, Blumenthal J, et al.). Enhancing recovery in coronary heart disease patients (ENRICHD): study design and methods. *Am Heart J* 2000;139(1 Pt 1):1-9. doi:10.1016/s0002-8703(00)90301-6
76. Zhou ES, Penedo FJ, Lewis JE, et al. Perceived stress mediates the effects of social support on health-related quality of life among men treated for localized prostate cancer. *J Psychosom Res* 2010;69(6):587-90. doi:10.1016/j.jpsychores.2010.04.019 [published Online First: 1 September 2010]
77. Pailler ME, Johnson TM, Kuszczak S, et al. Adjustment to acute leukemia: the impact of social support and marital satisfaction on distress and quality of life among newly diagnosed patients and their caregivers. *J Clin Psychol Med Settings* 2016;23(3):298-309. doi:10.1007/s10880-016-9459-6
78. Kristjanson LJ. Validity and reliability testing of the FAMCARE scale: measuring family satisfaction with advanced cancer care. *Soc Sci Med* 1993;36(5):693-701. doi:10.1016/0277-9536(93)90066-d
79. Kachel S, Steffens MC, Niedlich C. Traditional masculinity and femininity: validation of a new scale assessing gender roles. *Front Psychol* 2016;7:956. doi:10.3389/fpsyg.2016.00956. eCollection 2016.
80. Nascimento M, Kosminsky M, Colares V, et al. Translation and cross-cultural adaptation of Traditional Masculinity and Femininity Scale (TMF-s) for use with Brazilian university students. *J Health Sci* 2019;21(3):260-3. doi:http://dx.doi.org/10.17921/2447-8938.2019v21n3p260-263
81. Naing L, Winn T, Rusli BN. Practical issues in calculating the sample size for prevalence studies. *Archives of Orofacial Sciences* 2006;1:9-14.
82. Barrera M, Hancock K, Atenafu E, et al. Quality of life in pediatric oncology patients, caregivers and siblings after psychosocial screening: a randomized controlled trial. *Support Care Cancer* 2020;28(8):3659-68. doi:10.1007/s00520-019-05160-x [published Online First: 6 December 2019]
83. Kreidler SM, Muller KE, Grunwald GK, et al. GLIMPSE: online power computation for linear models with and without a baseline covariate. *J Stat Softw* 2013;54(10):i10. doi:10.18637/jss.v054.i10
84. Guo Y, Logan HL, Glueck DH, et al. Selecting a sample size for studies with repeated measures. *BMC Med Res Methodol* 2013;13(1):100. doi:10.1186/1471-2288-13-100.
85. Rennie DL, Nissim R. The grounded theory method and humanistic psychology. In: Schneider KJ, Pierson JF, Bugental JFT, eds. *The Handbook of Humanistic Psychology: Theory, Research, and Practice, Second Edition*. Thousand Oaks, CA: Sage Publications 2015;297-307. <https://us.sagepub.com/en-us/nam/the-handbook-of-humanistic-psychology/book238925>
86. Nissim R, Gagliese L, Rodin G. The desire for hastened death in individuals with advanced cancer: a longitudinal qualitative study. *Soc Sci Med*. 2009;69(2):165-71. doi:10.1016/j.socscimed.2009.04.021 [published Online First: 29 May 2009]
87. Nissim R, Rodin G, Schimmer A, et al. Finding new bearings: a qualitative study on the transition from inpatient to ambulatory care of patients with acute myeloid leukemia. *Support Care Cancer* 2014;22(9):2435-43. doi:10.1007/s00520-014-2230-3 [published Online First: 5 April 2014]



- 1  
2  
3 88. Nissim R, Zimmermann C, Minden M, et al. Abducted by the illness: a qualitative study  
4 of traumatic stress in individuals with acute leukemia. *Leuk Res* 2013;37(5):496-502.  
5 doi:10.1016/j.leukres.2012.12.007 [published Online First: 24 January 2013]  
6  
7 89. R Core Team (2013). R: A language and environment for statistical computing. R  
8 Foundation for Statistical Computing, Vienna, Austria. URL <http://www.R-project.org/>.  
9  
10 90. Shalev AY, Liberzon I, Marmar C. Post-traumatic stress disorder. *NEJM*  
11 2017;376(25):2459-2469.  
12  
13 91. Schultebraucks K, Galatzer-Levy IR. Machine learning for prediction of posttraumatic  
14 stress and resilience following trauma: an overview of basic concepts and recent  
15 advances. *J Trauma Stress* 2019;32(2):215-225.  
16  
17 92. Huys QJM, Maia TV, Frank MJ. Computational psychiatry as a bridge from neuroscience  
18 to clinical applications. *Nat Neurosci* 2016;19(3):404-413.  
19  
20 93. Schultebraucks K, Shalev AY. Precision Psychiatry Approach to Posttraumatic Stress  
21 Response. *Psychiat Ann* 2021;51(1):7-13.  
22  
23 94. Schultebraucks K, Sijbrandij M, Galatzer-Levy IR, et al. Forecasting individual risk for  
24 long-term Posttraumatic Stress Disorder in emergency medical settings using biomedical  
25 data: A machine learning multicenter cohort study. *Neurobiol Stress* 2021;14:100297.  
26 doi: 10.1016/j.ynstr.2021.100297.  
27  
28 95. Schultebraucks K, Shalev AY, Michopoulos V, et al. A Validated Predictive Algorithm  
29 of Posttraumatic Stress Course following Emergency Department Admission after a  
30 Traumatic Stressor. *Nat Med* 2020;26(7):1084-1088.  
31  
32 96. Schultebraucks K, Qian M, Abu-Amara D, et al. Pre-deployment risk factors for PTSD in  
33 active-duty personnel deployed to Afghanistan: a machine-learning approach for  
34 analyzing multivariate predictors. *Mol Psychiatry* 2021;26:5011–5022.  
35  
36 97. Schultebraucks K, Choi KW, Galatzer-Levy IR, et al. Discriminating heterogeneous  
37 trajectories of resilience and depression after major life stressors using polygenic scores.  
38 *JAMA Psychiatry* 2021;78(7):744-752. doi:10.1001/jamapsychiatry.2021.0228  
39  
40 98. Schultebraucks K, Ben-Zion Z, Admon R, et al. Assessment of early neurocognitive  
41 functioning increases the accuracy of predicting chronic PTSD risk. *Mol Psychiatry*  
42 2022;27:2247–2254.  
43  
44 99. Collins GS, Reitsma JB, Altman DG, et al. Transparent Reporting of a multivariable  
45 prediction model for Individual Prognosis or Diagnosis (TRIPOD): the TRIPOD  
46 Statement. *Br J Surg* 2015;102(3):148-58. doi:10.1002/bjs.9736  
47  
48 100. Hemingway H, Croft P, Perel P, et al. Prognosis Research Strategy (PROGRESS) 1: a  
49 framework for researching clinical outcomes. *BMJ* 2013;346:e5595.  
50 doi:10.1136/bmj.e5595  
51  
52 101. Moons KGM, Altman DG, Reitsma JB, et al. New guideline for the reporting of studies  
53 developing, validating, or updating a multivariable clinical prediction model: the  
54 TRIPOD Statement. *Adv Anat Pathol* 2015;22(5):303-5.  
55 doi:10.1097/PAP.000000000000072  
56  
57 102. Steyerberg EW, Moons KGM, van der Windt DA, et al. Prognosis Research Strategy  
58 (PROGRESS) 3: prognostic model research. *PLoS Med* 2013;10(2): e1001381.  
59 doi:10.1371/journal.pmed.1001381 [published Online First: 5 February 2013]  
60

- 1  
2  
3  
4  
5  
6  
7  
8  
9  
10  
11  
12  
13  
14  
15  
16  
17  
18  
19  
20  
21  
22  
23  
24  
25  
26  
27  
28  
29  
30  
31  
32  
33  
34  
35  
36  
37  
38  
39  
40  
41  
42  
43  
44  
45  
46  
47  
48  
49  
50  
51  
52  
53  
54  
55  
56  
57  
58  
59  
60
103. Cawley GC, Talbot NLC. On over-fitting in model selection and subsequent selection bias in performance evaluation. *J Mach Learn Res* 2010;11:2079-2107. <https://www.jmlr.org/papers/volume11/cawley10a/cawley10a.pdf>
  104. Steyerberg EW, Harrell Jr FE. Prediction models need appropriate internal, internal-external, and external validation. *J Clin Epidemiol* 2016;69:245-7. doi:10.1016/j.jclinepi.2015.04.005 [published Online First: 18 April 2015]
  105. Kuhn M, Johnson K. Applied Predictive Modeling. New York, NY: Springer; 2013. <https://link.springer.com/book/10.1007/978-1-4614-6849-3?page=2#toc>
  106. Carlson LE, Bultz BD, Specia M, et al. Partners of cancer patients: I. Impact, adjustment, and coping across the illness trajectory. *J Psychosoc Oncol* 2000;18(2):39-63. [https://psycnet.apa.org/doi/10.1300/J077v18n02\\_03](https://psycnet.apa.org/doi/10.1300/J077v18n02_03)
  107. Muthén LK, Muthén BO. Mplus User's Guide: Statistical Analysis with Latent Variables, Eighth Edition. Los Angeles, CA: Muthén & Muthén 1998-2017. [https://www.statmodel.com/download/usersguide/MplusUserGuideVer\\_8.pdf](https://www.statmodel.com/download/usersguide/MplusUserGuideVer_8.pdf)
  108. van de Schoot R, Sijbrandij M, Winter SD, et al. The GRoLTS-Checklist: guidelines for reporting on latent trajectory studies. *Struct Equ Modeling* 2017;24(3):451-67. doi:10.1080/10705511.2016.1247646
  109. Lundberg SM, Lee SI. A unified approach to interpreting model predictions. In: Guyon I, Luxburg UV, Bengio S, Wallach H, Fergus R, Vishwanathan S, Garnett R, eds. *Advances in Neural Information Processing Systems 30 (NIPS 2017)* 2017:4765-74. <https://papers.nips.cc/paper/2017/hash/8a20a8621978632d76c43dfd28b67767-Abstract.html>
  110. QSR International Pty Ltd. (2020) NVivo (released in March 2020), <https://www.qsrinternational.com/nvivo-qualitative-data-analysis-software/home>
  111. Lingard L, Albert M, Levinson W. Qualitative research: grounded theory, mixed methods, and action research. *BMJ (Clinical Research ed.)* 2008;337:a567. doi:10.1136/bmj.39602.690162.47
  112. Sandelowski M. What's in a name? Qualitative description revisited. *Res Nurs Health* 2010;33(1):77-84. doi:10.1002/nur.20362
  113. Sandelowski M. Whatever happened to qualitative description? *Res Nurs Health* 2000;23(4):334-40. doi:10.1002/1098-240x(200008)23:4<334::aid-nur9>3.0.co;2-g
  114. O'Cathain A, Murphy E, Nicholl J. Three techniques for integrating data in mixed methods studies. *BMJ (Clinical Research ed.)* 2010;341:c4587. doi:10.1136/bmj.c4587
  115. Morrow SL. Quality and trustworthiness in qualitative research in counseling psychology. *J Couns Psychol* 2005;52(2):250-60.
  116. Grimshaw JM, Eccles MP, Lavis JN, Hill SJ, Squires JE. Knowledge translation of research findings. *Implement Sci* 2012; 7(1):50.
