# Supplementary material for: Traumatic stress symptoms in family caregivers of patients with acute leukaemia: protocol for a multisite mixed methods, longitudinal, observational study
Source: PubMed Central journal article supplement — BMJ Open. 2022 Nov 4;12(11):e065422. doi: 10.1136/bmjopen-2022-065422 (PMC9639100; doi:10.1136/bmjopen-2022-065422), 2022-11-04
Supplement: bmjopen-2022-065422.reviewer_comments.pdf [file bmjopen-2022-065422.reviewer_comments.pdf]

## PEER REVIEW HISTORY

BMJ Open publishes all reviews undertaken for accepted manuscripts. Reviewers are asked to complete a checklist review form (<http://bmjopen.bmj.com/site/about/resources/checklist.pdf>) and are provided with free text boxes to elaborate on their assessment. These free text comments are reproduced below.

## ARTICLE DETAILS

|                            |                                                                                                                                                                                                                                            |
|----------------------------|--------------------------------------------------------------------------------------------------------------------------------------------------------------------------------------------------------------------------------------------|
| <b>TITLE (PROVISIONAL)</b> | Traumatic stress symptoms in family caregivers of patients with acute leukemia: protocol for a multisite mixed methods, longitudinal, observational study                                                                                  |
| <b>AUTHORS</b>             | Jibb, Lindsay; Nanos, Stephanie; Alexander, Sarah; Malfitano, Carmine; Rydall, Anne; Gupta, Sumit; Schimmer, Aaron; Zimmermann, Camilla; Hales, Sarah; Nissim, Rinat; Marmar, Charles; Schultebrucks, Katharina; Mah, Kenneth; Rodin, Gary |

This article was not externally reviewed at BMJ Open. Protocols that have been independently assessed prior to submission to BMJ Open are usually fast-tracked to publication on the grounds that further substantial changes will not be possible. This independent assessment will usually be external, independent review for both a substantial grant award from a non-commercial or government funder and ethics approval.
